# Supplementary material for: Gut Microbiota and Acylcarnitine Metabolites Connect the Beneficial Association between Estrogen and Lipid Metabolism Disorders in Ovariectomized Mice
Source: Microbiol Spectr. 2023 May 4;11(3):e00149-23. doi: 10.1128/spectrum.00149-23 (PMC10269676; doi:10.1128/spectrum.00149-23)
Supplement: Supplemental file 3 — Table S2. Download spectrum.00149-23-s0003.xlsx, XLSX file, 0.1 MB [file spectrum.00149-23-s0003.xlsx]

## Sheet: Con_VS_Sham
Table S2. The detailed information of DEG in Con vs. Sham.
Gene_id	Gene name	Gene description	FC(Sham/Con)	Log2FC(Sham/Con)	Pvalue	Padjust	Significant	Regulate	Con_10	Con_2	Con_3	Con_7	Con_8	Con_9	Sham_1	Sham_3	Sham_4	Sham_6	Sham_8	Sham_9
ENSMUSG00000000693	Loxl3	lysyl oxidase-like 3 [Source:MGI Symbol;Acc:MGI:1337004]	5.12548	2.35769	0.00143608	0.0482175	yes	up	0.93	1.34	0.75	0.35	1.05	0.38	0.43	0.3	0.74	0.52	0.8	1.06
ENSMUSG00000001228	Uhrf1	ubiquitin-like, containing PHD and RING finger domains, 1 [Source:MGI Symbol;Acc:MGI:1338889]	2.88473	1.52844	0.000727778	0.029843	yes	up	0.03	0.19	0.14	0.11	0.1	0.21	0.54	0	0.4	0.69	0.43	0.02
ENSMUSG00000001761	Smo	smoothened, frizzled class receptor [Source:MGI Symbol;Acc:MGI:108075]	0.489913	-1.0294	0.00106201	0.03966	yes	down	0.98	2.51	2.52	2.47	3.21	1.07	1.57	0	1.14	1.31	1.02	0.1
ENSMUSG00000002068	Ccne1	cyclin E1 [Source:MGI Symbol;Acc:MGI:88316]	4.91504	2.2972	2.36909e-08	5.41891e-06	yes	up	0.11	0.25	0.06	0.21	0.41	0.28	1.03	0	1.04	1.23	1.66	0.1
ENSMUSG00000002831	Plin4	perilipin 4 [Source:MGI Symbol;Acc:MGI:1929709]	5.93275	2.5687	9.93223e-05	0.00654946	yes	up	0.82	0.81	1.05	1.55	0.11	0.46	1.03	0.28	1.19	4.85	1.22	0.74
ENSMUSG00000003228	Grk5	G protein-coupled receptor kinase 5 [Source:MGI Symbol;Acc:MGI:109161]	9.13971	3.19215	0.000323171	0.0158224	yes	up	99.53	24.8	39.36	23.18	34.99	20.9	41.59	101.92	95.69	43.57	51.1	124.27
ENSMUSG00000003623	Crot	carnitine O-octanoyltransferase [Source:MGI Symbol;Acc:MGI:1921364]	0.398107	-1.32877	7.56912e-06	0.000748678	yes	down	61.45	271.85	225.46	178.84	164.06	212.57	154.42	1.24	73.42	77.41	78.23	3.63
ENSMUSG00000003721	Insig2	insulin induced gene 2 [Source:MGI Symbol;Acc:MGI:1920249]	0.234972	-2.08944	3.5429e-07	5.34685e-05	yes	down	14.94	189.95	227.96	128.04	95.79	150.49	44.82	0.82	37.73	51.23	68.59	0.96
ENSMUSG00000005125	Ndrg1	N-myc downstream regulated gene 1 [Source:MGI Symbol;Acc:MGI:1341799]	0.355514	-1.49202	2.06995e-06	0.000254639	yes	down	3.96	25.99	20.86	11.02	10.59	12.32	7.68	0.08	5.23	6.04	4.56	0.44
ENSMUSG00000005674	Tomm40l	translocase of outer mitochondrial membrane 40-like [Source:MGI Symbol;Acc:MGI:3589112]	9.34482	3.22417	8.75869e-05	0.00588158	yes	up	3.92	7.11	7.86	5.89	9.44	7.83	6.99	7.58	8.18	7.19	5.44	23.58
ENSMUSG00000006442	Srm	spermidine synthase [Source:MGI Symbol;Acc:MGI:102690]	2.27991	1.18898	4.31799e-13	3.16055e-10	yes	up	7.18	15.41	21.73	13.16	18.9	15.03	36.5	1.62	34.43	29.32	42.85	3.15
ENSMUSG00000006587	Snai3	snail family zinc finger 3 [Source:MGI Symbol;Acc:MGI:1353563]	7.56022	2.91843	5.08523e-06	0.000552627	yes	up	0	0.12	0.12	0.15	0.23	0.04	1.15	0	1.55	0.51	0.94	0.04
ENSMUSG00000006641	Slc5a6	solute carrier family 5 (sodium-dependent vitamin transporter), member 6 [Source:MGI Symbol;Acc:MGI:2660847]	3.00282	1.58632	2.663e-07	4.28391e-05	yes	up	0.72	2.35	2.05	3.24	2.99	3.07	11.54	0.15	10.39	7.51	8.26	0.26
ENSMUSG00000007216	Zfp775	zinc finger protein 775 [Source:MGI Symbol;Acc:MGI:2683557]	0.463552	-1.1092	1.06026e-05	0.00102112	yes	down	0.45	1.01	1.06	0.99	1.16	0.93	0.54	0	0.69	0.28	0.58	0.05
ENSMUSG00000007877	Tcap	titin-cap [Source:MGI Symbol;Acc:MGI:1330233]	43.8359	5.45404	0.000609228	0.0259258	yes	up	0	0.15	0.08	0	0	0	0.39	0.04	0	0.31	0.15	0.74
ENSMUSG00000009647	Mcu	mitochondrial calcium uniporter [Source:MGI Symbol;Acc:MGI:3026965]	0.37489	-1.41546	2.48644e-07	4.04433e-05	yes	down	9.03	8.27	8.25	7.77	10.2	10.58	3.8	0.06	4.23	4.37	4.19	1.43
ENSMUSG00000011257	Pabpc4	poly(A) binding protein, cytoplasmic 4 [Source:MGI Symbol;Acc:MGI:2385206]	2.90677	1.53942	0.00134268	0.0461328	yes	up	7.38	16.14	18.05	16.5	17.38	18.31	21.6	3.85	26.75	23.9	26.07	4.25
ENSMUSG00000015357	Clpx	caseinolytic mitochondrial matrix peptidase chaperone subunit [Source:MGI Symbol;Acc:MGI:1346017]	0.228192	-2.13168	2.81869e-09	8.09074e-07	yes	down	11.75	110.3	118.46	54.98	71.5	88.84	16.66	0.6	20.29	21.25	21.92	0.92
ENSMUSG00000015468	Notch4	notch 4 [Source:MGI Symbol;Acc:MGI:107471]	2.02459	1.01763	0.00042706	0.0194153	yes	up	0.35	0.71	1.28	1.7	0.49	1.77	2.98	0.03	2.41	1.59	2.16	0.15
ENSMUSG00000017868	Sgk2	serum/glucocorticoid regulated kinase 2 [Source:MGI Symbol;Acc:MGI:1351318]	0.380134	-1.39542	4.41886e-07	6.53411e-05	yes	down	13.62	22.51	37.69	32.51	26.64	28.53	18.45	0.19	9.4	14.62	7.02	0.95
ENSMUSG00000018566	Slc2a4	solute carrier family 2 (facilitated glucose transporter), member 4 [Source:MGI Symbol;Acc:MGI:95758]	5.1828	2.37373	0.000938413	0.0359924	yes	up	0.07	0.5	0.72	0.11	0.43	0.48	0.12	0	4.1	2.48	0.79	0.12
ENSMUSG00000018906	P4ha2	procollagen-proline, 2-oxoglutarate 4-dioxygenase (proline 4-hydroxylase), alpha II polypeptide [Source:MGI Symbol;Acc:MGI:894286]	2.01942	1.01394	1.04502e-07	1.96128e-05	yes	up	0.85	2.3	2.42	1.57	2.31	2.83	3.93	0.05	5.64	5.14	3.83	0.49
ENSMUSG00000020037	Rfx4	regulatory factor X, 4 (influences HLA class II expression) [Source:MGI Symbol;Acc:MGI:1918387]	0.140613	-2.8302	5.91023e-09	1.545e-06	yes	down	1	4.53	4.61	3.95	5.05	2.48	0.9	0	0.88	0.31	0.56	0
ENSMUSG00000020123	Avpr1a	arginine vasopressin receptor 1A [Source:MGI Symbol;Acc:MGI:1859216]	0.344431	-1.53771	5.57029e-07	7.99446e-05	yes	down	4.45	31.07	29.34	22.48	26.07	22.72	13.32	0.06	7.83	8.77	10.79	0.1
ENSMUSG00000020175	Rab36	RAB36, member RAS oncogene family [Source:MGI Symbol;Acc:MGI:1924127]	0.22865	-2.12878	6.9881e-06	0.000705509	yes	down	2.75	7.88	9.85	6.89	6.62	5.47	4.49	0.01	1.25	1.18	1.21	0.06
ENSMUSG00000020182	Ddc	dopa decarboxylase [Source:MGI Symbol;Acc:MGI:94876]	0.21358	-2.22715	3.20151e-11	1.33905e-08	yes	down	17.09	31.47	38.63	29.15	39.59	33.97	9.55	0.06	8.26	9.91	9.31	0.49
ENSMUSG00000020381	Mrnip	MRN complex interacting protein [Source:MGI Symbol;Acc:MGI:1915317]	0.217967	-2.19782	8.68395e-24	2.11874e-20	yes	down	10.29	12.72	11.06	12.41	12.54	11.22	3.3	0.03	2.73	5.03	2.43	0.16
ENSMUSG00000020572	Nampt	nicotinamide phosphoribosyltransferase [Source:MGI Symbol;Acc:MGI:1929865]	2.58777	1.37171	5.26732e-11	2.08401e-08	yes	up	4.44	11.25	10.16	9.46	10.7	9.7	19.84	0.63	34.34	33.13	34.99	1.39
ENSMUSG00000020604	Arsg	arylsulfatase G [Source:MGI Symbol;Acc:MGI:1921258]	0.469175	-1.0918	5.85988e-05	0.00430069	yes	down	5.26	7.94	9.91	6.83	9.23	4.45	5.26	0.19	4.51	2.28	4.54	0.75
ENSMUSG00000020620	Abca8b	ATP-binding cassette, sub-family A (ABC1), member 8b [Source:MGI Symbol;Acc:MGI:1351668]	0.428805	-1.22161	0.000142646	0.00848862	yes	down	8.4	12.63	12.07	8.29	9.75	9.68	7.38	0.05	6.89	5.57	6.14	0.28
ENSMUSG00000020623	Map2k6	mitogen-activated protein kinase kinase 6 [Source:MGI Symbol;Acc:MGI:1346870]	2.82181	1.49662	8.0499e-07	0.000108112	yes	up	2.75	3.43	2.35	3.3	3.66	2.22	6.47	0.09	7.39	10.94	6.65	1.14
ENSMUSG00000020642	Rnf144a	ring finger protein 144A [Source:MGI Symbol;Acc:MGI:1344401]	0.363134	-1.46143	0.000311259	0.0153418	yes	down	0.56	3	3.12	1.7	2.08	2.17	0.8	0	0.91	1.06	0.84	0.06
ENSMUSG00000020893	Per1	period circadian clock 1 [Source:MGI Symbol;Acc:MGI:1098283]	4.75617	2.2498	1.04231e-05	0.00101049	yes	up	0.97	6.87	2.26	0.74	1.61	1.34	4.14	0.45	16.17	10.41	6.46	1.03
ENSMUSG00000021219	Rgs6	regulator of G-protein signaling 6 [Source:MGI Symbol;Acc:MGI:1354730]	38.4557	5.26513	0.00011824	0.0073344	yes	up	0	0.19	0.01	0	0.01	0.01	0.04	0.01	0.02	0.26	0.02	4.82
ENSMUSG00000021268	Meg3	maternally expressed 3 [Source:MGI Symbol;Acc:MGI:1202886]	14.1872	3.82652	0.00137816	0.0467139	yes	up	4.17	0.47	0.46	0.12	0.35	0.23	0.48	2.93	1.18	1.79	0.37	7.93
ENSMUSG00000021360	Gcnt2	glucosaminyl (N-acetyl) transferase 2, I-branching enzyme [Source:MGI Symbol;Acc:MGI:1100870]	5.63868	2.49536	0.000193144	0.010395	yes	up	5.98	6.43	5.67	5.16	4.88	5.16	5.34	6.84	11.38	8.16	6.87	12.78
ENSMUSG00000022218	Tgm1	transglutaminase 1, K polypeptide [Source:MGI Symbol;Acc:MGI:98730]	2.34184	1.22764	2.30318e-06	0.000278646	yes	up	2.53	8.32	6.63	7.55	11.03	10.84	22.83	0.92	16	17.96	24.04	0.84
ENSMUSG00000022353	Mtss1	MTSS I-BAR domain containing 1 [Source:MGI Symbol;Acc:MGI:2384818]	2.233	1.15898	5.73908e-05	0.00424315	yes	up	20.33	29.09	29.61	24.99	34.53	25.69	44.83	2.8	93.09	52.38	70.11	6.45
ENSMUSG00000022389	Tef	thyrotroph embryonic factor [Source:MGI Symbol;Acc:MGI:98663]	3.0016	1.58573	1.93647e-08	4.57226e-06	yes	up	17.19	15.85	18.37	28.05	23.51	16.99	65.55	3.03	101.44	64.54	58.61	6.02
ENSMUSG00000022512	Cldn1	claudin 1 [Source:MGI Symbol;Acc:MGI:1276109]	0.184061	-2.44174	3.62993e-23	7.59122e-20	yes	down	16.21	33.95	27.97	23.08	25.9	19.11	5.88	0.07	4.04	5.7	5.73	0.55
ENSMUSG00000022550	Adck5	aarF domain containing kinase 5 [Source:MGI Symbol;Acc:MGI:2679274]	0.397928	-1.32942	0.000377374	0.0178206	yes	down	30.81	24.62	32.21	21.18	20.95	28.35	14.98	1.51	6.12	9	8.85	2.26
ENSMUSG00000022615	Tymp	thymidine phosphorylase [Source:MGI Symbol;Acc:MGI:1920212]	0.263517	-1.92403	0.000397082	0.0185123	yes	down	7.74	37.17	44.16	36.07	35.42	37.53	17.27	0.02	12.66	8.74	11.72	0.06
ENSMUSG00000022899	Slc15a2	solute carrier family 15 (H+/peptide transporter), member 2 [Source:MGI Symbol;Acc:MGI:1890457]	12.5152	3.64561	0.00135284	0.0461638	yes	up	0.25	0.46	0.16	0.08	0.06	1.62	0.36	0.11	3.29	0.12	0.53	1.19
ENSMUSG00000022951	Rcan1	regulator of calcineurin 1 [Source:MGI Symbol;Acc:MGI:1890564]	2.48901	1.31557	7.37602e-08	1.45916e-05	yes	up	2.41	10.42	8.42	6.45	8.94	8.17	14.41	1.11	30.36	14.79	22.94	1.01
ENSMUSG00000023087	Noct	nocturnin [Source:MGI Symbol;Acc:MGI:109382]	3.2617	1.70563	1.28569e-09	4.00452e-07	yes	up	2.12	6.13	3.75	1.83	4.1	3.21	12.78	0.82	37.57	16.24	17.16	2.17
ENSMUSG00000023243	Kcnk5	potassium channel, subfamily K, member 5 [Source:MGI Symbol;Acc:MGI:1336175]	2.23905	1.16288	5.56887e-06	0.000586494	yes	up	2.49	8.77	8.99	8.18	8.99	4.48	11.8	0.44	28.46	20.25	14.26	0.64
ENSMUSG00000023272	Creld2	cysteine-rich with EGF-like domains 2 [Source:MGI Symbol;Acc:MGI:1923987]	2.48277	1.31195	9.01852e-05	0.00600101	yes	up	4.65	26.79	13.05	10.27	14.02	9.71	21.45	0.87	29.21	27.64	40.66	5.37
ENSMUSG00000024042	Sik1	salt inducible kinase 1 [Source:MGI Symbol;Acc:MGI:104754]	2.90412	1.5381	0.00052652	0.0229396	yes	up	0.56	2.81	2.41	1.35	2.69	3.2	4.69	0.07	14.55	5.05	12.12	0.2
ENSMUSG00000024222	Fkbp5	FK506 binding protein 5 [Source:MGI Symbol;Acc:MGI:104670]	2.3404	1.22676	0.00133013	0.0460304	yes	up	2.11	23.12	20.06	13.68	16.67	15.59	21.88	0.64	55.64	34.48	68.91	4.6
ENSMUSG00000024277	Mapre2	microtubule-associated protein, RP/EB family, member 2 [Source:MGI Symbol;Acc:MGI:106271]	2.046	1.03281	2.62399e-11	1.12978e-08	yes	up	1.76	5.28	4.7	5.39	5.72	4.65	8.2	0.33	9.52	10.06	9.46	0.62
ENSMUSG00000025077	Dclre1a	DNA cross-link repair 1A [Source:MGI Symbol;Acc:MGI:1930042]	3.26058	1.70513	0.000185142	0.0100381	yes	up	4.63	3.14	3.5	3.53	4.51	3.8	6.19	0.73	9.91	14.33	7.07	3.86
ENSMUSG00000025185	Loxl4	lysyl oxidase-like 4 [Source:MGI Symbol;Acc:MGI:1914823]	0.230001	-2.12029	2.33125e-06	0.000279731	yes	down	0.26	3.35	2.19	1.37	1.5	1.93	0.58	0	0.45	0.42	0.56	0.01
ENSMUSG00000025436	Atp23	ATP23 metallopeptidase and ATP synthase assembly factor homolog [Source:MGI Symbol;Acc:MGI:1916984]	2.59921	1.37807	5.95277e-05	0.00433546	yes	up	1.99	2.97	3.38	3.66	2.81	5.63	7.22	0.54	9.83	6.53	7.61	1.49
ENSMUSG00000025504	Eps8l2	EPS8-like 2 [Source:MGI Symbol;Acc:MGI:2138828]	0.272139	-1.87758	8.64365e-21	1.58168e-17	yes	down	24.86	32.61	35.76	30.81	35.18	33.86	16.14	0.41	9.46	7.7	6.66	1.68
ENSMUSG00000025511	Tspan4	tetraspanin 4 [Source:MGI Symbol;Acc:MGI:1928097]	2.22344	1.15279	0.000116042	0.00725956	yes	up	12.65	45.58	38.18	46.42	37.69	39.64	108.03	1.1	111.56	106.48	125.57	3.42
ENSMUSG00000025813	Homer2	homer scaffolding protein 2 [Source:MGI Symbol;Acc:MGI:1347354]	2.16004	1.11105	0.000169987	0.00957091	yes	up	1.66	10.11	10.76	12.45	15.7	10.5	25.19	0.38	35.95	26.47	35.05	4.34
ENSMUSG00000025981	Coq10b	coenzyme Q10B [Source:MGI Symbol;Acc:MGI:1915126]	5.07408	2.34315	4.38426e-17	5.34844e-14	yes	up	7.18	9.9	6.55	6.46	7.25	6.36	36.81	1.47	55.9	42.63	41.87	4.39
ENSMUSG00000026077	Npas2	neuronal PAS domain protein 2 [Source:MGI Symbol;Acc:MGI:109232]	0.0415181	-4.59012	4.87376e-12	2.64248e-09	yes	down	0.18	1.94	1.49	0.28	0.88	1.07	0.05	0	0.03	0.05	0.03	0.01
ENSMUSG00000026179	Pnkd	paroxysmal nonkinesiogenic dyskinesia [Source:MGI Symbol;Acc:MGI:1930773]	0.372445	-1.4249	4.25578e-07	6.35717e-05	yes	down	16.74	63.94	62.25	55.53	60.75	63.95	44.31	0.95	35.84	44.04	34.92	2.46
ENSMUSG00000026185	Igfbp5	insulin-like growth factor binding protein 5 [Source:MGI Symbol;Acc:MGI:96440]	2.93216	1.55196	1.87713e-06	0.000234865	yes	up	0.28	1.24	1.68	0.89	0.99	0.92	2.09	0.11	1.86	5.32	3.05	0.2
ENSMUSG00000026435	Slc45a3	solute carrier family 45, member 3 [Source:MGI Symbol;Acc:MGI:1922082]	0.375593	-1.41276	0.000173342	0.0097224	yes	down	3.16	17.7	17.29	9.98	13.9	12.89	3.08	0.09	8.13	5.81	8.41	0.17
ENSMUSG00000026489	Coq8a	coenzyme Q8A [Source:MGI Symbol;Acc:MGI:1914676]	0.224321	-2.15636	1.07444e-11	5.42367e-09	yes	down	30.98	224.26	249.4	224.45	261.93	220.55	65.15	0.49	50.34	51.91	48.5	1.14
ENSMUSG00000026566	Mpzl1	myelin protein zero-like 1 [Source:MGI Symbol;Acc:MGI:1915731]	0.258076	-1.95413	1.03071e-09	3.35301e-07	yes	down	1.18	3.77	4.17	2.85	3.99	4.68	1.3	0	1.14	0.99	1.02	0.02
ENSMUSG00000026614	Slc30a10	solute carrier family 30, member 10 [Source:MGI Symbol;Acc:MGI:2685058]	0.467179	-1.09795	6.62842e-05	0.00466507	yes	down	5.41	9.72	9.95	5.41	6.89	9.93	3.32	0.18	4.5	2.06	4.21	0.46
ENSMUSG00000026638	Irf6	interferon regulatory factor 6 [Source:MGI Symbol;Acc:MGI:1859211]	0.416037	-1.26522	4.31609e-10	1.43598e-07	yes	down	4.83	18.09	15.98	8.48	14.15	10.44	6.1	0.07	6.95	4.44	5.87	0.28
ENSMUSG00000026773	Pfkfb3	6-phosphofructo-2-kinase/fructose-2,6-biphosphatase 3 [Source:MGI Symbol;Acc:MGI:2181202]	2.6386	1.39977	7.13683e-06	0.00071559	yes	up	0.83	3.02	3.24	1.61	1.81	1.29	4.1	0.17	7.46	5.53	3.2	2.96
ENSMUSG00000026839	Upp2	uridine phosphorylase 2 [Source:MGI Symbol;Acc:MGI:1923904]	2.21299	1.14599	4.41884e-05	0.00343566	yes	up	53.09	90.96	139.72	222.36	230.23	118.75	279.12	6.79	470.19	514.88	389.59	13.75
ENSMUSG00000027048	Abcb11	ATP-binding cassette, sub-family B (MDR/TAP), member 11 [Source:MGI Symbol;Acc:MGI:1351619]	0.458485	-1.12505	1.14543e-09	3.64521e-07	yes	down	484.88	149.9	211.97	185.91	206.41	251.98	117.77	15.26	129.07	96.59	97.03	33.48
ENSMUSG00000027068	Dhrs9	dehydrogenase/reductase (SDR family) member 9 [Source:MGI Symbol;Acc:MGI:2442798]	0.0800893	-3.64225	3.26557e-12	1.91219e-09	yes	down	0.22	1.44	0.84	0.54	1.02	2.82	0.11	0	0.08	0.12	0.06	0
ENSMUSG00000027253	Lrp4	low density lipoprotein receptor-related protein 4 [Source:MGI Symbol;Acc:MGI:2442252]	2.9047	1.53839	3.6949e-14	3.00498e-11	yes	up	0.89	1.94	2.72	2.79	1.95	2.3	6.21	0.4	8.49	5.68	6.12	0.57
ENSMUSG00000027405	Nop56	NOP56 ribonucleoprotein [Source:MGI Symbol;Acc:MGI:1914384]	6.47817	2.69559	0.00135272	0.0461638	yes	up	28.62	8.41	14.01	9.88	10.01	10.93	14.28	19.89	19.84	10.22	15.95	38.3
ENSMUSG00000027478	Dnmt3b	DNA methyltransferase 3B [Source:MGI Symbol;Acc:MGI:1261819]	0.328201	-1.60735	0.000253182	0.0130966	yes	down	0.51	0.74	0.56	0.3	1.23	0.93	0.13	0	0.27	0.29	0.34	0.04
ENSMUSG00000027579	Srms	src-related kinase lacking C-terminal regulatory tyrosine and N-terminal myristylation sites [Source:MGI Symbol;Acc:MGI:101865]	0.338761	-1.56166	0.000970709	0.036814	yes	down	0.24	0.61	0.64	0.4	0.65	0.52	0.26	0	0.09	0.16	0.34	0
ENSMUSG00000027954	Efna1	ephrin A1 [Source:MGI Symbol;Acc:MGI:103236]	0.445574	-1.16626	0.000216886	0.0115454	yes	down	31.15	16.56	37.25	43.71	59.27	48.32	21.7	0.56	22.11	20.63	28.08	1.3
ENSMUSG00000028150	Rorc	RAR-related orphan receptor gamma [Source:MGI Symbol;Acc:MGI:104856]	2.52403	1.33573	2.88771e-12	1.76138e-09	yes	up	6.51	16.07	16.11	23.67	18.55	26.22	37.63	0.69	64	51.69	60.72	1.67
ENSMUSG00000028240	Cyp7a1	cytochrome P450, family 7, subfamily a, polypeptide 1 [Source:MGI Symbol;Acc:MGI:106091]	2.9547	1.56301	1.31593e-05	0.001227	yes	up	2.2	13.23	10.93	16.27	26.9	10.33	39.32	0.57	80.11	37.19	51.46	0.92
ENSMUSG00000028246	Faxc	failed axon connections homolog [Source:MGI Symbol;Acc:MGI:1923382]	33.9248	5.08427	0.000737164	0.0301434	yes	up	0	0	0.02	0	0.01	0	0.04	0.06	0.06	0.03	0.04	0.01
ENSMUSG00000028327	Stra6l	STRA6-like [Source:MGI Symbol;Acc:MGI:1921402]	0.467672	-1.09643	2.06569e-11	9.16353e-09	yes	down	31.41	60.64	69.49	54.73	60.26	52.49	32.16	1.09	34.11	27.4	30.48	1.45
ENSMUSG00000028444	Cntfr	ciliary neurotrophic factor receptor [Source:MGI Symbol;Acc:MGI:99605]	2.47679	1.30847	0.00111898	0.0411575	yes	up	0.35	1.85	2.31	1.13	1.63	1.34	1.08	0.25	4.81	3.25	3.06	0.38
ENSMUSG00000028527	Ak4	adenylate kinase 4 [Source:MGI Symbol;Acc:MGI:87979]	2.09408	1.06632	0.00118324	0.0424035	yes	up	3.38	18.74	19.42	16.68	14.29	24.12	40.5	0.67	64.12	37.06	47.46	3.09
ENSMUSG00000028555	Ttc39a	tetratricopeptide repeat domain 39A [Source:MGI Symbol;Acc:MGI:2444350]	2.51995	1.33339	0.000930626	0.0358511	yes	up	0.24	0.56	0.4	0.39	0.63	0.21	1	0.01	0.62	1.03	1.85	0.07
ENSMUSG00000028680	Plk3	polo like kinase 3 [Source:MGI Symbol;Acc:MGI:109604]	3.53296	1.82088	0.000836538	0.0330083	yes	up	12.99	7.86	5.69	4.32	4.54	9.08	12.07	2.7	28.51	18.59	28.48	4.79
ENSMUSG00000028766	Alpl	alkaline phosphatase, liver/bone/kidney [Source:MGI Symbol;Acc:MGI:87983]	2.31141	1.20877	6.85834e-08	1.37533e-05	yes	up	2.06	6.99	9.11	4.64	5.09	4.42	11.42	0.44	11.83	8.12	10.01	2.18
ENSMUSG00000028862	Map3k6	mitogen-activated protein kinase kinase kinase 6 [Source:MGI Symbol;Acc:MGI:1855691]	6.07544	2.60299	0.000222431	0.0117128	yes	up	1.84	0.96	2.02	0.31	0.92	1	0.85	1.31	0.89	1.34	1.38	1.86
ENSMUSG00000028957	Per3	period circadian clock 3 [Source:MGI Symbol;Acc:MGI:1277134]	7.44949	2.89714	6.97361e-09	1.79099e-06	yes	up	1.25	0.27	0.46	0.84	1.45	0.44	6.01	0.2	11.93	9.3	6.77	0.6
ENSMUSG00000029003	Mad2l2	MAD2 mitotic arrest deficient-like 2 [Source:MGI Symbol;Acc:MGI:1919140]	0.311574	-1.68235	2.78936e-07	4.43842e-05	yes	down	3.94	22.37	16.74	18.18	18.74	20.6	8.29	0.09	6.76	6.22	6.84	0.24
ENSMUSG00000029188	Slc34a2	solute carrier family 34 (sodium phosphate), member 2 [Source:MGI Symbol;Acc:MGI:1342284]	0.260522	-1.94052	0.00021487	0.0114799	yes	down	0.2	1.17	2.29	0.63	1.13	1.57	0.31	0.02	0.37	0.08	0.59	0.01
ENSMUSG00000029238	Clock	circadian locomotor output cycles kaput [Source:MGI Symbol;Acc:MGI:99698]	0.447427	-1.16027	5.28489e-12	2.76305e-09	yes	down	0.94	3.43	3.9	2.48	3.12	3.63	1.34	0.09	1.61	1.33	1.54	0.09
ENSMUSG00000029482	Aacs	acetoacetyl-CoA synthetase [Source:MGI Symbol;Acc:MGI:1926144]	3.24596	1.69864	0.000574756	0.0246741	yes	up	3.79	14.56	14.09	9.55	12.48	8.06	38.11	0.43	71.2	36.39	59.85	0.3
ENSMUSG00000029657	Hsph1	heat shock 105kDa/110kDa protein 1 [Source:MGI Symbol;Acc:MGI:105053]	3.03965	1.60391	5.3395e-06	0.000566413	yes	up	1.2	9.01	4.95	4.35	8.04	5.7	16.71	0.28	32.55	20.49	23.97	0.64
ENSMUSG00000029811	Aoc1	amine oxidase, copper-containing 1 [Source:MGI Symbol;Acc:MGI:1923757]	19.8851	4.31361	0.000709636	0.0292704	yes	up	0.85	0.02	0.15	0.08	0.1	0.02	0.33	0.4	0.1	0.02	0.15	2.89
ENSMUSG00000030032	Wdr54	WD repeat domain 54 [Source:MGI Symbol;Acc:MGI:1922909]	13.5004	3.75493	0.000124446	0.00762247	yes	up	0.32	0.22	0.12	0.34	0.66	0.2	0.69	0.26	0.4	0.51	0.24	0.24
ENSMUSG00000030470	Csrp3	cysteine and glycine-rich protein 3 [Source:MGI Symbol;Acc:MGI:1330824]	0.491542	-1.02461	1.54282e-05	0.00141158	yes	down	20.46	34.69	52.75	58.82	53.75	34.19	32.9	0.28	23.45	21.08	28.11	1.65
ENSMUSG00000030556	Lrrc28	leucine rich repeat containing 28 [Source:MGI Symbol;Acc:MGI:1915689]	2.08086	1.05718	0.00010784	0.00692808	yes	up	2.33	13.16	14.62	11.29	9.78	14.55	17.55	0.83	46.46	20.69	37.71	1.03
ENSMUSG00000030729	Pgm2l1	phosphoglucomutase 2-like 1 [Source:MGI Symbol;Acc:MGI:1918224]	2.25958	1.17606	2.83426e-06	0.000329292	yes	up	0.14	0.59	0.36	0.55	0.41	0.51	0.57	0.04	1.21	1.28	0.82	0.08
ENSMUSG00000030762	Aqp8	aquaporin 8 [Source:MGI Symbol;Acc:MGI:1195271]	0.260513	-1.94057	7.09883e-05	0.00490188	yes	down	73.34	104.53	125.89	127.91	95.4	167.02	47.61	0.1	50.1	45.68	45.42	0.86
ENSMUSG00000031016	Wee1	WEE 1 homolog 1 (S. pombe) [Source:MGI Symbol;Acc:MGI:103075]	8.52034	3.09091	3.55453e-15	3.25217e-12	yes	up	0.19	0.54	0.74	1.16	1.08	0.54	7.35	0.04	9.32	8.37	7.55	0.26
ENSMUSG00000031024	Denn2b	DENN domain containing 2B [Source:MGI Symbol;Acc:MGI:108517]	0.287427	-1.79873	2.61893e-16	2.94912e-13	yes	down	16.39	24.39	19.86	13.09	16.9	14.42	2.76	0.21	5.02	3.87	5.11	1.23
ENSMUSG00000031286	Glt28d2	glycosyltransferase 28 domain containing 2 [Source:MGI Symbol;Acc:MGI:2443773]	0.496175	-1.01108	3.49274e-05	0.00274894	yes	down	0.57	2.01	1.56	1.33	1.8	1.76	0.87	0	1.15	0.58	0.71	0.11
ENSMUSG00000031595	Pdgfrl	platelet-derived growth factor receptor-like [Source:MGI Symbol;Acc:MGI:1916047]	15.7959	3.98148	0.00014877	0.00872366	yes	up	0.02	0.84	0.26	0.4	0.4	0.08	0.25	0.2	0.51	0.31	0.43	13.67
ENSMUSG00000031972	Acta1	actin, alpha 1, skeletal muscle [Source:MGI Symbol;Acc:MGI:87902]	11.74	3.55336	0.00140838	0.0476149	yes	up	0.22	0	0.1	0.45	0.49	0.18	0.42	0.13	0.32	0.4	0.17	0.96
ENSMUSG00000032010	Usp2	ubiquitin specific peptidase 2 [Source:MGI Symbol;Acc:MGI:1858178]	25.149	4.65243	1.21839e-46	1.78361e-42	yes	up	0.77	0.84	1.38	2.76	1.1	1.15	34.72	1.57	39.17	43.54	38.16	6.42
ENSMUSG00000032121	Tmem218	transmembrane protein 218 [Source:MGI Symbol;Acc:MGI:1913529]	0.313468	-1.67361	0.000464787	0.0208712	yes	down	0.18	1.61	1.96	2.78	1.75	1.48	0.81	0	0.52	0.59	0.59	0.01
ENSMUSG00000032218	Ccnb2	cyclin B2 [Source:MGI Symbol;Acc:MGI:88311]	7.47867	2.90278	0.000238265	0.012457	yes	up	0.15	0.17	0.13	0.16	0.32	0.09	0.43	0.17	0.5	0.47	0.4	0.31
ENSMUSG00000032249	Anp32a	acidic (leucine-rich) nuclear phosphoprotein 32 family, member A [Source:MGI Symbol;Acc:MGI:108447]	0.480106	-1.05857	2.10927e-19	3.08776e-16	yes	down	62.59	134.02	147.48	146.4	175.35	145.03	78.91	2.4	65.24	82.9	61.33	5.74
ENSMUSG00000032311	Nrg4	neuregulin 4 [Source:MGI Symbol;Acc:MGI:1933833]	8.22726	3.04041	8.72272e-26	3.1923e-22	yes	up	1.49	4.37	3.82	3.82	1.85	4.07	17.61	1.08	28.67	22.41	27.81	2.75
ENSMUSG00000032349	Elovl5	ELOVL family member 5, elongation of long chain fatty acids (yeast) [Source:MGI Symbol;Acc:MGI:1916051]	0.38417	-1.38018	1.74987e-05	0.00157155	yes	down	125.69	270.42	287.13	202.48	210.31	273.91	127	0.83	125.44	109.67	141.41	5.92
ENSMUSG00000032607	Amt	aminomethyltransferase [Source:MGI Symbol;Acc:MGI:3646700]	0.419237	-1.25416	5.87566e-05	0.00430069	yes	down	10.02	41.74	50.35	35.15	45.14	34.16	25.28	0.3	16.77	17.13	18.17	0.73
ENSMUSG00000032715	Trib3	tribbles pseudokinase 3 [Source:MGI Symbol;Acc:MGI:1345675]	0.430143	-1.21711	0.000164926	0.00932411	yes	down	3.59	3.36	5.82	11.18	8.83	7.32	5.01	0.07	3.64	3.91	2.31	0.22
ENSMUSG00000032786	Alas1	aminolevulinic acid synthase 1 [Source:MGI Symbol;Acc:MGI:87989]	5.2375	2.38888	1.40935e-10	5.15785e-08	yes	up	34.36	448.56	318.62	115.03	141.5	120.16	1379.68	12.03	1799.23	889.81	1286.73	17.77
ENSMUSG00000032815	Fanca	Fanconi anemia, complementation group A [Source:MGI Symbol;Acc:MGI:1341823]	41.4317	5.37266	5.14195e-06	0.000552627	yes	up	0.59	0.46	0.01	0.05	0.11	0.74	0.47	2.59	0.65	0.56	0.71	4.13
ENSMUSG00000032898	Fbxo21	F-box protein 21 [Source:MGI Symbol;Acc:MGI:1924223]	0.450206	-1.15134	0.00104559	0.0391467	yes	down	13.44	31.21	51.5	47.57	40.99	38.85	38.12	0.2	18.19	17.99	17.34	0.91
ENSMUSG00000033066	Gas7	growth arrest specific 7 [Source:MGI Symbol;Acc:MGI:1202388]	0.347053	-1.52677	1.21716e-11	5.93932e-09	yes	down	0.46	1.88	2.05	1.26	1.5	1.73	0.57	0.18	0.65	0.67	0.66	0.07
ENSMUSG00000033530	Ttc7b	tetratricopeptide repeat domain 7B [Source:MGI Symbol;Acc:MGI:2144724]	2.02746	1.01967	0.000288372	0.0145068	yes	up	3.01	4	4.49	4.63	3.56	3.88	5.83	1.33	6.88	5.14	7.59	2.07
ENSMUSG00000033917	Gde1	glycerophosphodiester phosphodiesterase 1 [Source:MGI Symbol;Acc:MGI:1891827]	2.10342	1.07273	4.86749e-13	3.39311e-10	yes	up	7.48	20.84	23.47	20.26	26.59	23.3	36.74	1.29	49.28	50.99	61.47	3.39
ENSMUSG00000034647	Ankrd12	ankyrin repeat domain 12 [Source:MGI Symbol;Acc:MGI:1914357]	3.35747	1.74737	0.000810184	0.0323168	yes	up	0.63	0.96	1.14	0.88	0.84	0.86	1.02	0.1	3.01	1.94	1.35	0.98
ENSMUSG00000035064	Eef2k	eukaryotic elongation factor-2 kinase [Source:MGI Symbol;Acc:MGI:1195261]	2.00564	1.00406	0.000508241	0.0224778	yes	up	1.26	2.29	3.84	2.78	5.83	3.77	10.19	0.54	11.04	6.78	7.12	0.2
ENSMUSG00000035498	Cdcp1	CUB domain containing protein 1 [Source:MGI Symbol;Acc:MGI:2442010]	0.411701	-1.28033	1.02317e-06	0.00013255	yes	down	2.56	1.85	2.66	1.36	2.51	1.33	0.61	0.05	0.88	0.78	0.75	0.13
ENSMUSG00000035686	Thrsp	thyroid hormone responsive [Source:MGI Symbol;Acc:MGI:109126]	3.38853	1.76066	6.06681e-06	0.000625437	yes	up	151.79	203.68	374.8	274.28	425.86	209.39	376.34	23.75	1968.93	1301.01	1639.3	35.45
ENSMUSG00000036078	Sigmar1	sigma non-opioid intracellular receptor 1 [Source:MGI Symbol;Acc:MGI:1195268]	0.405815	-1.30111	0.000404962	0.018701	yes	down	44.2	161.96	178.77	147.15	176.7	149.71	80.99	0.76	78.33	77.05	82.14	1.63
ENSMUSG00000036216	Leap2	liver-expressed antimicrobial peptide 2 [Source:MGI Symbol;Acc:MGI:2672795]	0.400916	-1.31863	1.15395e-07	2.06008e-05	yes	down	64.73	92.47	146.79	134.19	101.47	144.5	64.12	1.1	56.17	61.83	64.24	2.16
ENSMUSG00000036863	Syde2	synapse defective 1, Rho GTPase, homolog 2 (C. elegans) [Source:MGI Symbol;Acc:MGI:3036264]	2.07247	1.05135	0.000294452	0.0147619	yes	up	0.29	0.72	0.98	0.92	0.89	0.98	1.82	0.03	3.11	2.17	1.82	0.05
ENSMUSG00000036885	Arhgef26	Rho guanine nucleotide exchange factor (GEF) 26 [Source:MGI Symbol;Acc:MGI:1918053]	2.42428	1.27755	8.54613e-06	0.000834045	yes	up	9.85	9.58	10.28	8.07	6.78	6.62	10.29	3.12	22.58	17.82	21.09	9.72
ENSMUSG00000036957	Lrfn3	leucine rich repeat and fibronectin type III domain containing 3 [Source:MGI Symbol;Acc:MGI:2442512]	0.231826	-2.10889	2.51995e-12	1.66712e-09	yes	down	1.1	4.01	6.52	3.67	4.95	4.19	1.1	0.08	0.73	0.93	1.04	0.06
ENSMUSG00000037379	Spon2	spondin 2, extracellular matrix protein [Source:MGI Symbol;Acc:MGI:1923724]	0.216354	-2.20853	4.86507e-07	7.12197e-05	yes	down	3	10.63	5.76	4.65	6.43	3.58	2.73	0	1.11	0.78	0.66	0.17
ENSMUSG00000037443	Cep85	centrosomal protein 85 [Source:MGI Symbol;Acc:MGI:1917262]	11.2063	3.48624	0.000177464	0.00989292	yes	up	446.61	63.72	100.43	52.9	79.46	54.34	86.13	660.9	217	88.49	91.46	722.01
ENSMUSG00000037605	Adgrl3	adhesion G protein-coupled receptor L3 [Source:MGI Symbol;Acc:MGI:2441950]	217.102	7.76223	1.60202e-07	2.69563e-05	yes	up	0.01	0.06	0.26	0.07	0.01	0.06	0.04	2.84	0.31	0.05	0.06	1.2
ENSMUSG00000037606	Osbpl5	oxysterol binding protein-like 5 [Source:MGI Symbol;Acc:MGI:1930265]	2.05986	1.04254	0.000939211	0.0359924	yes	up	0.45	1.95	1.29	2.21	1.56	1.65	2.64	0.44	2.96	2.35	1.66	0.5
ENSMUSG00000037847	Nmrk1	nicotinamide riboside kinase 1 [Source:MGI Symbol;Acc:MGI:2147434]	3.6555	1.87007	0.000110162	0.0070116	yes	up	11.27	7.43	6.21	7.51	8.24	5.98	17.84	2.3	33.16	23.64	30.58	5.62
ENSMUSG00000037904	Ankrd9	ankyrin repeat domain 9 [Source:MGI Symbol;Acc:MGI:1921501]	2.98015	1.57538	4.60025e-08	1.03605e-05	yes	up	1.07	1.45	0.94	1.73	1.73	2.24	4.76	0.48	4.59	3.63	4.18	0.7
ENSMUSG00000038085	Cnbd2	cyclic nucleotide binding domain containing 2 [Source:MGI Symbol;Acc:MGI:1918123]	4.00355	2.00128	6.88084e-05	0.00479088	yes	up	12.32	12.58	21.01	10.02	14	7.26	15.38	3.82	53.55	17.51	21.93	6.14
ENSMUSG00000038233	Gask1a	golgi associated kinase 1A [Source:MGI Symbol;Acc:MGI:3041196]	0.355834	-1.49072	5.56892e-05	0.00418069	yes	down	1.7	6.21	7.78	5.81	6.37	6.7	2.23	0	5.07	2.11	2.14	0.07
ENSMUSG00000038539	Atf5	activating transcription factor 5 [Source:MGI Symbol;Acc:MGI:2141857]	0.450832	-1.14934	2.22338e-09	6.5096e-07	yes	down	97.43	341.91	360.45	288.9	344.31	352.66	230.03	2.16	180.36	128.4	177.85	7.76
ENSMUSG00000038550	Ciart	circadian associated repressor of transcription [Source:MGI Symbol;Acc:MGI:2684975]	27.6031	4.78676	7.17198e-16	7.49933e-13	yes	up	0.81	0.18	0.03	0.83	1.34	0.55	13.86	1.9	30.13	15.72	17.15	3.26
ENSMUSG00000038751	Ptk6	PTK6 protein tyrosine kinase 6 [Source:MGI Symbol;Acc:MGI:99683]	0.216764	-2.20581	9.01122e-05	0.00600101	yes	down	0.1	0.5	0.56	0.88	1.22	0.51	0.26	0	0.11	0.2	0.09	0
ENSMUSG00000038754	Elovl3	elongation of very long chain fatty acids (FEN1/Elo2, SUR4/Elo3, yeast)-like 3 [Source:MGI Symbol;Acc:MGI:1195976]	0.296154	-1.75558	5.42478e-05	0.00409347	yes	down	0.97	5.97	8.26	3.73	6.41	1.94	2.31	0.05	1.18	1.26	1.43	0.04
ENSMUSG00000038793	Lefty1	left right determination factor 1 [Source:MGI Symbol;Acc:MGI:107405]	3.38402	1.75874	0.000264622	0.0136401	yes	up	0.09	0.32	0.68	1.86	1.27	0.77	1.78	0.07	2.71	3.23	3.31	0.1
ENSMUSG00000039145	Camk1d	calcium/calmodulin-dependent protein kinase ID [Source:MGI Symbol;Acc:MGI:2442190]	0.391702	-1.35217	2.12934e-06	0.000259761	yes	down	15.22	29.97	48.53	34.18	51.17	35.57	10.04	1.15	26.14	22.77	13.69	19.3
ENSMUSG00000039157	Fam102a	family with sequence similarity 102, member A [Source:MGI Symbol;Acc:MGI:2138935]	2.79468	1.48268	2.91896e-13	2.24898e-10	yes	up	2.51	5.09	7.71	7.45	7.64	3.58	22.33	1.01	12.43	13.12	16.69	2.86
ENSMUSG00000039457	Ppl	periplakin [Source:MGI Symbol;Acc:MGI:1194898]	2.53217	1.34037	2.82766e-06	0.000329292	yes	up	0.86	1.24	1.81	1.84	1.74	2.93	4.27	0.1	5.2	8.63	3.64	0.38
ENSMUSG00000039620	Trmt9b	tRNA methyltransferase 9B [Source:MGI Symbol;Acc:MGI:2442328]	0.338485	-1.56283	3.33194e-10	1.13433e-07	yes	down	1.37	2.84	2.92	2.15	3.44	3.67	1.22	0.04	0.84	1.08	1.25	0.19
ENSMUSG00000039633	Lonrf1	LON peptidase N-terminal domain and ring finger 1 [Source:MGI Symbol;Acc:MGI:3609241]	3.68783	1.88277	1.45253e-06	0.000183307	yes	up	0.08	0.53	0.4	0.62	0.79	0.93	2.19	0.03	2.78	2.52	3.03	0.07
ENSMUSG00000039981	Zc3h12d	zinc finger CCCH type containing 12D [Source:MGI Symbol;Acc:MGI:3045313]	0.23401	-2.09535	5.90935e-06	0.000617907	yes	down	0.47	2.26	2.45	1.62	1.53	1.12	0.59	0	0.26	0.71	0.39	0
ENSMUSG00000039982	Dtx4	deltex 4, E3 ubiquitin ligase [Source:MGI Symbol;Acc:MGI:2672905]	0.278754	-1.84293	1.49817e-09	4.47585e-07	yes	down	1.14	5.47	5.61	4.72	4.64	4.91	1.42	0.1	0.73	0.61	0.94	0.07
ENSMUSG00000040170	Fmo2	flavin containing monooxygenase 2 [Source:MGI Symbol;Acc:MGI:1916776]	2.46617	1.30227	4.89976e-11	1.99243e-08	yes	up	2.98	6.3	12.61	7.2	12.18	8.82	15.59	0.48	31.59	23.67	23.18	1.33
ENSMUSG00000040430	Pitpnc1	phosphatidylinositol transfer protein, cytoplasmic 1 [Source:MGI Symbol;Acc:MGI:1919045]	2.31452	1.21072	8.32459e-08	1.62485e-05	yes	up	2.53	4.2	3.9	3.83	3.94	3.92	6.19	0.33	10.08	7.07	9.87	1.27
ENSMUSG00000040441	Slc26a10	solute carrier family 26, member 10 [Source:MGI Symbol;Acc:MGI:2143920]	6.40362	2.67889	0.000286778	0.0144764	yes	up	1.92	1.82	1.73	0.74	0.82	1.69	2.2	0.98	2.53	3.03	2.84	3.51
ENSMUSG00000040591	1110051M20Rik	RIKEN cDNA 1110051M20 gene [Source:MGI Symbol;Acc:MGI:1915079]	7.12838	2.83358	0.000119005	0.00735068	yes	up	1.63	1.14	2	1.74	2.01	2.49	1.27	1.18	2.14	6.51	1.65	1.49
ENSMUSG00000040675	Mthfd1l	methylenetetrahydrofolate dehydrogenase (NADP+ dependent) 1-like [Source:MGI Symbol;Acc:MGI:1924836]	5.13917	2.36154	1.91621e-10	6.8418e-08	yes	up	0.06	0.21	0.25	0.31	0.26	0.21	1.35	0.08	0.64	0.89	0.9	0.08
ENSMUSG00000040936	Ulk4	unc-51-like kinase 4 [Source:MGI Symbol;Acc:MGI:1921622]	18.221	4.18753	8.41882e-05	0.0057057	yes	up	0.14	0.02	0.06	0.39	0.12	0.01	0.19	0.65	0.17	0.39	0.04	1.49
ENSMUSG00000040957	Cables1	CDK5 and Abl enzyme substrate 1 [Source:MGI Symbol;Acc:MGI:1927065]	0.315451	-1.66451	1.43432e-19	2.333e-16	yes	down	1.96	3.1	3.34	2.74	3.45	2.55	0.84	0.04	1.04	0.8	1	0.17
ENSMUSG00000040964	Arhgef10l	Rho guanine nucleotide exchange factor (GEF) 10-like [Source:MGI Symbol;Acc:MGI:1920004]	0.456234	-1.13215	1.85941e-07	3.05841e-05	yes	down	5.5	20.61	22.78	16.96	16.81	20.33	11.66	0.11	12.85	14.01	14.85	0.21
ENSMUSG00000041119	Pde9a	phosphodiesterase 9A [Source:MGI Symbol;Acc:MGI:1277179]	0.422781	-1.24202	0.0009761	0.0368277	yes	down	10.52	17.6	17.56	18.41	22.99	18.34	7.21	0.9	3.55	4.51	5.2	2.02
ENSMUSG00000041959	S100a10	S100 calcium binding protein A10 (calpactin) [Source:MGI Symbol;Acc:MGI:1339468]	0.493948	-1.01757	2.06041e-08	4.78768e-06	yes	down	62.56	159.01	158.87	120.81	152.75	168.61	102.17	1.97	57.95	74.01	72.06	6.76
ENSMUSG00000042363	Lgalsl	lectin, galactoside binding-like [Source:MGI Symbol;Acc:MGI:1916114]	0.441128	-1.18073	6.01893e-06	0.000624902	yes	down	1.42	7.94	5.96	5.27	6.04	5.68	1.64	0.05	2.25	3.55	2.76	0.24
ENSMUSG00000042510	AA986860	expressed sequence AA986860 [Source:MGI Symbol;Acc:MGI:2138143]	3.57025	1.83602	0.000310002	0.0153315	yes	up	0.81	0.59	0.73	1.05	0.69	1.04	1.95	0.83	2.42	3.08	1.46	0.93
ENSMUSG00000042834	Nrep	neuronal regeneration related protein [Source:MGI Symbol;Acc:MGI:99444]	2.96478	1.56793	0.00016004	0.00915169	yes	up	4.21	5.67	5.09	4.52	11.8	2.34	26.71	0.42	19.61	12.32	37.62	0.97
ENSMUSG00000042874	D930007J09Rik	RIKEN cDNA D930007J09 gene [Source:MGI Symbol;Acc:MGI:3686989]	0.288889	-1.79141	0.00118839	0.0424315	yes	down	0.15	1.05	0.69	0.47	0.69	0.29	0.19	0	0.18	0.04	0.3	0.01
ENSMUSG00000044345	Marveld1	MARVEL (membrane-associating) domain containing 1 [Source:MGI Symbol;Acc:MGI:2147570]	2.8657	1.51889	7.65059e-30	5.59985e-26	yes	up	2.37	6.97	8.53	8.19	9.35	6.26	22.2	0.64	22.58	21.52	24.21	1.55
ENSMUSG00000044748	Defb1	defensin beta 1 [Source:MGI Symbol;Acc:MGI:1096878]	0.337685	-1.56625	9.43517e-05	0.00624984	yes	down	0.55	1.9	2.02	2.56	2.23	2.54	0.87	0	0.85	0.35	0.83	0.1
ENSMUSG00000045287	Rtn4rl1	reticulon 4 receptor-like 1 [Source:MGI Symbol;Acc:MGI:2661375]	0.395217	-1.33928	3.61542e-09	9.98606e-07	yes	down	1.51	4.7	4.76	4.49	6.24	5.43	2.52	0.09	1.69	1.75	1.68	0.09
ENSMUSG00000045672	Col27a1	collagen, type XXVII, alpha 1 [Source:MGI Symbol;Acc:MGI:2672118]	10.6499	3.41277	0.000471119	0.0210908	yes	up	2.39	0.7	0.43	0.45	1.04	0.77	0.99	0.99	2.76	1.9	2.04	4.42
ENSMUSG00000045826	Ptprcap	protein tyrosine phosphatase, receptor type, C polypeptide-associated protein [Source:MGI Symbol;Acc:MGI:97811]	8.03372	3.00607	0.00022469	0.0117894	yes	up	0.62	2.04	3.27	2.69	3.12	3.02	3.05	1.76	2.47	1.6	4.62	3.39
ENSMUSG00000046230	Vps13a	vacuolar protein sorting 13A [Source:MGI Symbol;Acc:MGI:2444304]	2.29845	1.20066	1.67483e-05	0.00151345	yes	up	1.86	1.64	2.02	1.79	1.91	1.99	2.17	0.3	7.26	4.67	3.77	1.21
ENSMUSG00000047822	Angptl8	angiopoietin-like 8 [Source:MGI Symbol;Acc:MGI:3643534]	12.5279	3.64707	0.000219183	0.0115834	yes	up	202.91	140.74	91.98	56.97	65.89	101.92	51.3	266.7	447.31	65.28	286.6	188.75
ENSMUSG00000048960	Prex2	phosphatidylinositol-3,4,5-trisphosphate-dependent Rac exchange factor 2 [Source:MGI Symbol;Acc:MGI:1923385]	4.47632	2.16231	0.00032644	0.0159292	yes	up	0.81	0.77	0.78	0.53	0.38	0.45	0.67	0.32	1.25	0.95	1	1.75
ENSMUSG00000049580	Tsku	tsukushi, small leucine rich proteoglycan [Source:MGI Symbol;Acc:MGI:2443855]	14.3095	3.8389	1.05318e-24	3.08351e-21	yes	up	2.79	5.75	7.29	5.02	7.09	7.33	33.52	2.99	98.98	43.3	72.48	8.99
ENSMUSG00000049744	Arhgap15	Rho GTPase activating protein 15 [Source:MGI Symbol;Acc:MGI:1923367]	5.81404	2.53954	0.00081486	0.032415	yes	up	1.14	0.57	0.36	0.41	0.46	0.3	0.53	0.51	0.53	0.38	0.62	3.7
ENSMUSG00000050556	Kcnb1	potassium voltage gated channel, Shab-related subfamily, member 1 [Source:MGI Symbol;Acc:MGI:96666]	3.21704	1.68574	0.000177733	0.00989292	yes	up	1.24	0.37	0.44	0.2	0.18	0.16	0.84	0.51	0.64	0.59	0.48	3.27
ENSMUSG00000050860	Phospho1	phosphatase, orphan 1 [Source:MGI Symbol;Acc:MGI:2447348]	0.243768	-2.03642	0.000152522	0.0088602	yes	down	0.97	5.66	13.08	9.44	14.78	18.61	4.79	0	3.61	4.72	3.83	0
ENSMUSG00000051000	Fam160a1	family with sequence similarity 160, member A1 [Source:MGI Symbol;Acc:MGI:2444746]	0.372641	-1.42414	7.49911e-06	0.000746799	yes	down	0.54	2.25	1.28	1.37	1.97	1.33	0.65	0	0.7	0.52	0.65	0.03
ENSMUSG00000052040	Klf13	Kruppel-like factor 13 [Source:MGI Symbol;Acc:MGI:1354948]	2.40541	1.26629	3.28508e-07	5.0094e-05	yes	up	4.06	8.53	10.8	8.66	11.75	6.32	18.11	0.93	38.33	25.63	23.59	4.38
ENSMUSG00000052632	Asap2	ArfGAP with SH3 domain, ankyrin repeat and PH domain 2 [Source:MGI Symbol;Acc:MGI:2685438]	0.31475	-1.66772	2.44177e-05	0.0020195	yes	down	2.05	3.77	5.23	3.47	5.78	3.84	0.64	0.37	0.7	0.76	0.9	0.47
ENSMUSG00000054115	Skp2	S-phase kinase-associated protein 2 [Source:MGI Symbol;Acc:MGI:1351663]	3.02627	1.59754	0.000912501	0.0353389	yes	up	0.14	0.34	0.2	0.31	0.28	0.47	0.62	0.11	0.64	0.47	0.6	0.12
ENSMUSG00000054434	Tmem120b	transmembrane protein 120B [Source:MGI Symbol;Acc:MGI:3603158]	2.91125	1.54164	0.00143258	0.0482103	yes	up	1.23	1.63	1.17	1.69	1.1	0.7	0.99	2.67	4.18	3.45	2.59	2.41
ENSMUSG00000055116	Arntl	aryl hydrocarbon receptor nuclear translocator-like [Source:MGI Symbol;Acc:MGI:1096381]	0.0525244	-4.25087	8.48633e-16	8.28209e-13	yes	down	1.12	8.85	6.87	3.47	4.94	6.49	0.2	0	0.08	0.54	0.53	0.01
ENSMUSG00000055401	Fbxo6	F-box protein 6 [Source:MGI Symbol;Acc:MGI:1354743]	0.463501	-1.10936	7.56205e-07	0.000103459	yes	down	13.29	44.93	48.69	38.68	42.97	37.84	28.23	0.23	14.05	20.1	17.85	1.75
ENSMUSG00000055866	Per2	period circadian clock 2 [Source:MGI Symbol;Acc:MGI:1195265]	6.42065	2.68272	1.79045e-11	8.19076e-09	yes	up	4.47	1.32	1.99	1.36	1.68	0.96	6.79	0.3	12.22	8.77	7.5	1.18
ENSMUSG00000056608	Chd9	chromodomain helicase DNA binding protein 9 [Source:MGI Symbol;Acc:MGI:1924001]	5.46015	2.44894	1.5941e-08	3.82557e-06	yes	up	5.67	21.38	18.67	18.17	17.8	15.17	22.07	3.46	58.52	32.5	61.75	5.45
ENSMUSG00000057054	Inca1	inhibitor of CDK, cyclin A1 interacting protein 1 [Source:MGI Symbol;Acc:MGI:2144284]	0.289701	-1.78736	0.000619873	0.0260757	yes	down	25.97	12.62	22.7	25.31	29.67	11.28	15.3	0	7.74	9.13	6.45	0.6
ENSMUSG00000057068	Fam47e	family with sequence similarity 47, member E [Source:MGI Symbol;Acc:MGI:2686227]	3.33459	1.73751	1.28474e-07	2.23896e-05	yes	up	3.46	11.81	13.01	7.87	9.57	9.12	28.86	0.49	29.93	30.99	23.18	3.28
ENSMUSG00000058672	Tubb2a	tubulin, beta 2A class IIA [Source:MGI Symbol;Acc:MGI:107861]	0.349581	-1.5163	0.000107904	0.00692808	yes	down	8.63	140.13	97.39	39.9	60.19	107.18	21.76	1.2	32.15	26.36	27.17	1.6
ENSMUSG00000059824	Dbp	D site albumin promoter binding protein [Source:MGI Symbol;Acc:MGI:94866]	4.61311	2.20574	0.000401695	0.018668	yes	up	49.05	3.5	9.24	56.6	48.27	15.63	205.19	8.92	134.71	114.48	93.44	37.89
ENSMUSG00000062563	Cys1	cystin 1 [Source:MGI Symbol;Acc:MGI:2177632]	5.4088	2.43531	0.000750586	0.030513	yes	up	2.97	1.91	1.58	1.68	3.41	1.26	4.2	1.31	3.92	4.7	3.53	3.09
ENSMUSG00000063919	Srrm4	serine/arginine repetitive matrix 4 [Source:MGI Symbol;Acc:MGI:1916205]	0.434186	-1.20361	0.000780419	0.0313861	yes	down	1.75	2.77	2.89	1.77	1.95	1.38	0.61	0.03	1.16	1.02	1.3	0.05
ENSMUSG00000064254	Ethe1	ethylmalonic encephalopathy 1 [Source:MGI Symbol;Acc:MGI:1913321]	0.332256	-1.58963	6.59361e-06	0.000670305	yes	down	10.67	86.4	159.98	129.79	150.32	153.93	44.81	1.08	45.44	45.76	38.3	0.7
ENSMUSG00000064354	mt-Co2	mitochondrially encoded cytochrome c oxidase II [Source:MGI Symbol;Acc:MGI:102503]	15.5538	3.9592	5.21755e-05	0.00397522	yes	up	198.78	1016.88	1904.35	1181.21	398.52	590.79	489.01	2277.46	475.79	1947.36	1391.27	811.67
ENSMUSG00000064357	mt-Atp6	mitochondrially encoded ATP synthase 6 [Source:MGI Symbol;Acc:MGI:99927]	25.8269	4.6908	0.00133321	0.0460304	yes	up	4212.39	930.76	1116.53	413.16	504.55	1160.56	919.76	9384.91	1276.47	1682.97	768.62	6508.6
ENSMUSG00000064358	mt-Co3	mitochondrially encoded cytochrome c oxidase III [Source:MGI Symbol;Acc:MGI:102502]	33.1936	5.05284	0.000179609	0.00992186	yes	up	1410.37	326.86	1131.39	300.42	1069.51	639.2	385.05	6154.73	527.66	498.15	286.59	2666.41
ENSMUSG00000064367	mt-Nd5	mitochondrially encoded NADH dehydrogenase 5 [Source:MGI Symbol;Acc:MGI:102496]	21.6717	4.43774	0.00116913	0.0422591	yes	up	5833.06	1259.83	1110.75	1125.33	1499.81	1513.65	1135.17	9076.09	1474.24	1620.05	1227.27	11203.6
ENSMUSG00000064368	mt-Nd6	mitochondrially encoded NADH dehydrogenase 6 [Source:MGI Symbol;Acc:MGI:102495]	23.0456	4.52642	0.000430416	0.0195073	yes	up	2494.71	710.42	680.51	647.99	839.54	743.05	623.78	5075.57	832.31	878.7	781.82	5864.19
ENSMUSG00000067279	Ppp1r3c	protein phosphatase 1, regulatory subunit 3C [Source:MGI Symbol;Acc:MGI:1858229]	0.287174	-1.8	9.39026e-08	1.80874e-05	yes	down	3.93	21.57	34.89	24.82	24.78	36.62	11.46	0.17	6.59	5.58	9.24	0.42
ENSMUSG00000068876	Cgn	cingulin [Source:MGI Symbol;Acc:MGI:1927237]	0.441419	-1.17978	1.08856e-18	1.44867e-15	yes	down	3.43	7.41	7.6	6.6	7.7	6.75	3.97	0.16	3.22	3.08	2.96	0.22
ENSMUSG00000069825	Gm49340	predicted gene, 49340 [Source:MGI Symbol;Acc:MGI:6121532]	0.289967	-1.78604	6.49187e-05	0.00461332	yes	down	1.88	2.76	1.88	2.07	3.13	1.23	1.33	0.02	0.99	0.68	0.55	0
ENSMUSG00000070565	Rasal2	RAS protein activator like 2 [Source:MGI Symbol;Acc:MGI:2443881]	2.59333	1.37481	6.12566e-05	0.00441742	yes	up	4.03	1.44	1.61	1.41	1.64	1.91	2.33	0.92	4.14	2.48	2.83	3.65
ENSMUSG00000071633	Gm4952	predicted gene 4952 [Source:MGI Symbol;Acc:MGI:3643569]	0.423132	-1.24082	0.000341173	0.0164833	yes	down	14.54	129.63	139.74	116.45	102	104.77	98.18	0.7	40.2	36.52	53.45	1.18
ENSMUSG00000074521	Gm14327	predicted gene 14327 [Source:MGI Symbol;Acc:MGI:3652188]	2.74629	1.45748	2.85271e-07	4.4904e-05	yes	up	1.85	2.7	2.58	3.03	2.49	2.94	4.32	0.33	11.24	8.28	6.97	0.45
ENSMUSG00000074623	Gm826	predicted gene 826 [Source:MGI Symbol;Acc:MGI:2685672]	3.22194	1.68793	0.000277478	0.0141042	yes	up	0.6	2.28	1.16	1.12	2.36	0.71	2.46	0.14	5.17	3.42	3.21	0.93
ENSMUSG00000074768	Bhmt	betaine-homocysteine methyltransferase [Source:MGI Symbol;Acc:MGI:1339972]	0.358317	-1.48069	0.000924792	0.0357204	yes	down	632.44	1232.79	2516.74	1066.3	1706.77	1156.14	790.94	6.05	558.45	803.89	854.91	9.21
ENSMUSG00000075511	1700001L05Rik	RIKEN cDNA 1700001L05 gene [Source:MGI Symbol;Acc:MGI:1916541]	2.07261	1.05145	0.000110672	0.00701353	yes	up	0.41	1.74	1.69	1.08	1.92	1.18	3.17	0.79	4.88	2.94	2.59	0.11
ENSMUSG00000078485	Plekhn1	pleckstrin homology domain containing, family N member 1 [Source:MGI Symbol;Acc:MGI:2387630]	10.0725	3.33235	0.00128831	0.0450108	yes	up	0.76	0.14	0.21	0.15	0.21	0.36	0.17	0.45	0.36	0.36	0.15	0.76
ENSMUSG00000079293	Clec7a	C-type lectin domain family 7, member a [Source:MGI Symbol;Acc:MGI:1861431]	3.02722	1.59799	0.00125258	0.0439724	yes	up	0.48	4.22	3.19	4.16	3.9	2.93	5.53	0.74	4.35	5.6	4.75	0.82
ENSMUSG00000087006	Gm13889	predicted gene 13889 [Source:MGI Symbol;Acc:MGI:3652053]	0.486012	-1.04094	0.00109772	0.040696	yes	down	1.21	3.83	4.43	2.66	5.17	2.97	1.85	0.06	1.04	1.77	1.7	0.31
ENSMUSG00000089712	Gm15889	predicted gene 15889 [Source:MGI Symbol;Acc:MGI:3802159]	2.86233	1.51719	0.00148961	0.0495221	yes	up	0.26	2.31	1.3	0.63	0.69	0.53	1.2	0.11	3.36	3.37	2.71	0.58
ENSMUSG00000090306	Adh6-ps1	alcohol dehydrogenase 6 (class V), pseudogene 1 [Source:MGI Symbol;Acc:MGI:1918999]	0.45585	-1.13337	0.000246004	0.0128158	yes	down	3.4	5.77	6.29	3.91	5.55	2.68	3.47	0.04	2.7	1.66	2.7	0.23
ENSMUSG00000090622	A930033H14Rik	RIKEN cDNA A930033H14 gene [Source:MGI Symbol;Acc:MGI:2444562]	15.8739	3.98859	4.82754e-09	1.28492e-06	yes	up	0.25	0.16	0.23	0.23	0.25	0.1	1.13	0.23	2.6	1.06	1.01	0.96
ENSMUSG00000090877	Hspa1b	heat shock protein 1B [Source:MGI Symbol;Acc:MGI:99517]	3.05156	1.60955	0.00112384	0.041233	yes	up	0.29	5.97	4.5	1.41	2.19	2.51	10.81	0.11	18.88	5.97	9.01	0.44
ENSMUSG00000091586	Cyp4f17	cytochrome P450, family 4, subfamily f, polypeptide 17 [Source:MGI Symbol;Acc:MGI:3646233]	0.415136	-1.26834	1.95243e-05	0.00171147	yes	down	2.97	4.93	5.83	3.95	4.37	5.06	2.62	0.06	2.21	2.58	2.87	0.03
ENSMUSG00000091780	Sco2	SCO2 cytochrome c oxidase assembly protein [Source:MGI Symbol;Acc:MGI:3818630]	0.307191	-1.70279	1.02953e-07	1.95732e-05	yes	down	70.7	56.43	65.58	55.95	50.68	61.82	22.36	0.94	25.57	20.16	23.5	1.97
ENSMUSG00000091844	Gm8251	predicted gene 8251 [Source:MGI Symbol;Acc:MGI:3647616]	18.7263	4.22699	0.00124956	0.0439724	yes	up	0.01	0	0	0.01	0.01	0.02	0	0.01	0.04	0.05	0.03	0.09
ENSMUSG00000091898	Tnnc1	troponin C, cardiac/slow skeletal [Source:MGI Symbol;Acc:MGI:98779]	14.6318	3.87104	7.47213e-05	0.00513543	yes	up	0.75	0.54	1.09	0.85	0.65	2.51	1.11	1.11	0.49	1.72	1.41	3.11
ENSMUSG00000092035	Peg10	paternally expressed 10 [Source:MGI Symbol;Acc:MGI:2157785]	10.386	3.37657	0.00149038	0.0495221	yes	up	0.01	0.03	0.05	0.01	0.01	0.03	0.03	0	0.05	0.94	0.02	0.02
ENSMUSG00000094786	Gm14403	predicted gene 14403 [Source:MGI Symbol;Acc:MGI:3649813]	2.62855	1.39427	4.78509e-05	0.00366748	yes	up	2.3	4.56	3.24	2.71	4.6	3.08	5.24	0.3	14.49	12.14	9.37	0.56
ENSMUSG00000095562	Erdr1	erythroid differentiation regulator 1 [Source:NCBI gene (formerly Entrezgene);Acc:170942]	63.4715	5.98804	1.25907e-05	0.00118151	yes	up	0.47	7.79	6.47	5.2	8.93	21.47	0.11	69.71	62.99	25.32	8.53	153.9
ENSMUSG00000096768	Gm47283	predicted gene, 47283 [Source:MGI Symbol;Acc:MGI:6096131]	92.971	6.53871	3.08172e-06	0.000355223	yes	up	1.09	6.75	17.45	4.8	25.81	23.61	0.04	142.65	92.56	15.42	20.8	387.68
ENSMUSG00000097615	Gm2061	predicted gene 2061 [Source:MGI Symbol;Acc:MGI:3780228]	0.247663	-2.01355	0.000115193	0.00724074	yes	down	0.41	0.68	0.52	0.29	0.45	0.69	0.11	0	0.26	0.1	0.2	0
ENSMUSG00000097781	9330136K24Rik	RIKEN cDNA 9330136K24 gene [Source:MGI Symbol;Acc:MGI:2442883]	16.4442	4.0395	0.00137854	0.0467139	yes	up	0	0.91	0.12	0.13	0.51	0.66	0.12	2.18	0.11	0.15	0.71	0.2
ENSMUSG00000100862	Gm10925	predicted gene 10925 [Source:MGI Symbol;Acc:MGI:3809095]	33.5568	5.06853	0.000115246	0.00724074	yes	up	14611.3	3392.43	3025	3272.56	4046.58	3968.24	2984.31	38162	3821.73	4942.25	2991.98	49639.8
ENSMUSG00000101904	Gm29427	predicted gene 29427 [Source:MGI Symbol;Acc:MGI:5580133]	2.29948	1.20131	0.000160981	0.00916965	yes	up	1.35	1.44	2	1.32	1.05	1.85	1.47	6.05	4.07	2.81	2.32	4.93
ENSMUSG00000104060	Gm37954	predicted gene, 37954 [Source:MGI Symbol;Acc:MGI:5611182]	12.9311	3.69278	0.00115725	0.0419746	yes	up	0.97	0.09	0.6	0.18	0.81	0.38	0.12	0.41	1.2	0.25	0.32	3.29
ENSMUSG00000105703	Gm43305	predicted gene 43305 [Source:MGI Symbol;Acc:MGI:5663442]	7.55521	2.91747	0.000337663	0.0163677	yes	up	27.06	1.9	1.88	5.89	1.65	0.43	4.4	3.23	9.24	10.5	10.96	4.66
ENSMUSG00000108815	Gm49388	predicted gene, 49388 [Source:MGI Symbol;Acc:MGI:6121614]	0.326036	-1.6169	3.33727e-06	0.000378715	yes	down	68.3	62.09	75.13	76.3	86.34	59.11	42.49	0.82	16.37	16.21	19.01	3.62
ENSMUSG00000109731	Gm45425	predicted gene 45425 [Source:MGI Symbol;Acc:MGI:5791261]	0.48817	-1.03455	0.000768186	0.0309793	yes	down	0.71	2.44	2.61	1.73	2.3	1.63	1.21	0	1.28	1.07	1.07	0.02
ENSMUSG00000109904	Gm45819	predicted gene 45819 [Source:MGI Symbol;Acc:MGI:5804934]	51.5033	5.68659	5.22983e-08	1.14268e-05	yes	up	0	0	0.08	0.03	0	0.04	1.75	0	2.42	1.66	1.55	0
ENSMUSG00000110386	Gm42031	predicted gene, 42031 [Source:MGI Symbol;Acc:MGI:5624916]	4.33458	2.11589	3.30558e-05	0.00262991	yes	up	1.9	7.08	11.86	5.93	7.84	3.59	8.4	2.45	33.17	11.43	13.01	2.94
ENSMUSG00000110537	Gm4316	predicted gene 4316 [Source:MGI Symbol;Acc:MGI:3782497]	8.61655	3.10711	0.000203917	0.0109346	yes	up	0.46	0.27	0.72	0.28	0.51	0.22	0.79	0.5	0.89	0.73	0.44	0.64
ENSMUSG00000110750	Gm48702	predicted gene, 48702 [Source:MGI Symbol;Acc:MGI:6098340]	16.2651	4.02371	2.51132e-05	0.00205381	yes	up	4.98	2.59	3.52	3.27	3.24	3.34	6.12	11.24	5.56	6.92	4.57	6.79
ENSMUSG00000111253	Gm34654	predicted gene, 34654 [Source:MGI Symbol;Acc:MGI:5593813]	0.0373808	-4.74156	8.64902e-05	0.0058347	yes	down	2.57	0.33	0.3	0.9	1.1	0.29	0	0	0.06	0.11	0	0
ENSMUSG00000112109	Gm30906	predicted gene, 30906 [Source:MGI Symbol;Acc:MGI:5590065]	0.0847402	-3.56081	1.96314e-29	9.57949e-26	yes	down	2.57	5.69	6.01	6.88	5.76	5.91	0.49	0	0.44	0.72	0.39	0
ENSMUSG00000112368	Gm49376	predicted gene, 49376 [Source:MGI Symbol;Acc:MGI:6121596]	26.1824	4.71052	0.000612773	0.025926	yes	up	0.14	0	0	0	0.29	0.37	0.18	0.21	0.53	0.18	0.88	1.54
ENSMUSG00000112437	Gm35188	predicted gene, 35188 [Source:MGI Symbol;Acc:MGI:5594347]	29.9268	4.90336	0.000957237	0.0364619	yes	up	0.38	0.16	0.05	0.02	0.09	0.18	0.03	0.61	0.27	0.02	0.06	1.72
ENSMUSG00000112774	Gm36041	predicted gene, 36041 [Source:MGI Symbol;Acc:MGI:5595200]	0.223145	-2.16395	1.00852e-10	3.8852e-08	yes	down	4.12	9.72	7.77	11.47	8.59	10.88	4.56	0.03	2.94	2.04	2.07	0.06
ENSMUSG00000113063	Gm34667	predicted gene, 34667 [Source:MGI Symbol;Acc:MGI:5593826]	0.454714	-1.13697	6.95246e-07	9.6016e-05	yes	down	4.8	8.26	8.04	7.05	7.11	6.67	2.59	0.06	4.2	3.93	2.54	0.44
ENSMUSG00000113961	Gm48498	predicted gene, 48498 [Source:MGI Symbol;Acc:MGI:6098024]	11.3315	3.50226	0.000142578	0.00848862	yes	up	0.2	0.19	0.16	0.15	0.34	0.34	0.15	0.18	0.46	0.29	0.31	0.96
ENSMUSG00000115919	Gm31583	predicted gene, 31583 [Source:MGI Symbol;Acc:MGI:5590742]	0.241562	-2.04954	6.85834e-08	1.37533e-05	yes	down	3.07	2.25	8.13	8.29	4.91	4.89	5.49	0	3.68	0.87	2.2	0.12
ENSMUSG00000116165	Pdxp	pyridoxal (pyridoxine, vitamin B6) phosphatase [Source:MGI Symbol;Acc:MGI:1919282]	6.60416	2.72338	3.40001e-06	0.000382867	yes	up	0.16	0.03	0.06	0.18	0.16	0.06	0.62	0	0.82	1.02	1.3	0.1
ENSMUSG00000117310	Ptp4a1	protein tyrosine phosphatase 4a1 [Source:MGI Symbol;Acc:MGI:1277096]	2.04959	1.03534	2.59228e-06	0.000306036	yes	up	7.51	33.26	27.43	22.69	23.24	31.71	33.87	1.51	51.12	50.65	50.89	6.01
ENSMUSG00000117485	Gm19696	predicted gene, 19696 [Source:MGI Symbol;Acc:MGI:5011881]	0.372514	-1.42463	0.00118113	0.0424035	yes	down	13.12	10.06	13.51	11.54	12.22	16.53	6.65	0.31	5.63	2.85	2.74	0.98
ENSMUSG00000117748	Derpc	DERPC proline and glycine rich nuclear protein [Source:MGI Symbol;Acc:MGI:6303050]	0.109299	-3.19365	0.000637239	0.026653	yes	down	1.59	0.68	4.58	2.59	1.1	1.44	1.47	0	2.44	2.03	0.45	0

## Sheet: Con_VS_L
Table S2. The detailed information of DEG in Con vs. L.
Gene_id	Gene name	Gene description	FC(L/Con)	Log2FC(L/Con)	Pvalue	Padjust	Significant	Regulate	Con_10	Con_2	Con_3	Con_7	Con_8	Con_9	L_1	L_10	L_3	L_4	L_6	L_8
ENSMUSG00000001228	Uhrf1	ubiquitin-like, containing PHD and RING finger domains, 1 [Source:MGI Symbol;Acc:MGI:1338889]	2.95596	1.56363	9.287e-05	0.0303685	yes	up	0.03	0.19	0.14	0.11	0.1	0.21	0.08	0.27	0.5	0.52	0.47	0.77
ENSMUSG00000003526	Prodh	proline dehydrogenase [Source:MGI Symbol;Acc:MGI:97770]	0.497338	-1.0077	6.30974e-05	0.0263721	yes	down	78.85	97.37	227.8	199.63	251.14	164.31	24.54	123.76	69.79	77.91	106.46	120.59
ENSMUSG00000009013	Dynll1	dynein light chain LC8-type 1 [Source:MGI Symbol;Acc:MGI:1861457]	2.21342	1.14627	1.38742e-05	0.010334	yes	up	10.59	9.79	8.88	4.39	7.37	7.13	17.84	14.02	11.79	15.92	12.7	13.3
ENSMUSG00000009092	Derl3	Der1-like domain family, member 3 [Source:MGI Symbol;Acc:MGI:1917627]	5.44021	2.44366	5.94019e-05	0.0256903	yes	up	0.25	11.64	1.42	2.53	0.72	0.81	1.56	7.17	15.28	31.6	8.8	17.35
ENSMUSG00000012123	Crybg2	crystallin beta-gamma domain containing 2 [Source:MGI Symbol;Acc:MGI:1334463]	0.394488	-1.34195	8.60845e-05	0.0288534	yes	down	2.52	4.61	2.85	3.73	1.8	1.73	7.3	0.86	1.2	1.04	0.64	0.65
ENSMUSG00000021270	Hsp90aa1	heat shock protein 90, alpha (cytosolic), class A member 1 [Source:MGI Symbol;Acc:MGI:96250]	2.24861	1.16903	1.49955e-05	0.0105813	yes	up	23.09	36.16	20.96	18.13	18.45	21.51	14.25	48.23	62.71	83.66	62.91	49.82
ENSMUSG00000023272	Creld2	cysteine-rich with EGF-like domains 2 [Source:MGI Symbol;Acc:MGI:1923987]	3.56596	1.83429	5.44032e-10	2.43128e-06	yes	up	4.65	26.79	13.05	10.27	14.02	9.71	17.21	44.36	47.5	35.86	85.93	40.22
ENSMUSG00000026723	Trdmt1	tRNA aspartic acid methyltransferase 1 [Source:MGI Symbol;Acc:MGI:1274787]	0.456216	-1.13221	6.88147e-05	0.0263721	yes	down	0.37	0.98	2.02	0.93	2.55	0.56	0.8	1.18	0.54	0.34	0.84	0.57
ENSMUSG00000028456	Unc13b	unc-13 homolog B [Source:MGI Symbol;Acc:MGI:1342278]	2.1274	1.08909	8.14131e-05	0.0288534	yes	up	0.39	1.11	0.67	0.44	1.15	0.74	0.9	0.87	1.64	2.44	2.39	1.89
ENSMUSG00000028832	Stmn1	stathmin 1 [Source:MGI Symbol;Acc:MGI:96739]	2.00218	1.00157	1.05472e-06	0.00129489	yes	up	1.28	3.18	4.29	5.27	4.33	5.29	3.13	6.85	11.59	10.14	8.16	6.54
ENSMUSG00000028838	Extl1	exostosin-like glycosyltransferase 1 [Source:MGI Symbol;Acc:MGI:1888742]	0.392836	-1.348	1.91116e-05	0.0119769	yes	down	0.62	0.63	1.71	1.46	2.03	1.2	0.1	0.64	0.84	0.52	0.73	0.4
ENSMUSG00000029657	Hsph1	heat shock 105kDa/110kDa protein 1 [Source:MGI Symbol;Acc:MGI:105053]	3.43343	1.77965	9.97057e-10	3.34189e-06	yes	up	1.2	9.01	4.95	4.35	8.04	5.7	3.98	19.59	23.83	27.86	26.31	14.63
ENSMUSG00000040957	Cables1	CDK5 and Abl enzyme substrate 1 [Source:MGI Symbol;Acc:MGI:1927065]	0.479713	-1.05976	7.18883e-05	0.0267724	yes	down	1.96	3.1	3.34	2.74	3.45	2.55	0.16	2.39	2.18	1.42	1.84	1.18
ENSMUSG00000045551	Fpr1	formyl peptide receptor 1 [Source:MGI Symbol;Acc:MGI:107443]	2.19827	1.13637	1.73779e-05	0.0116493	yes	up	0.72	5.01	2.22	3.26	3.03	3.87	2.21	5.39	6.08	8.37	10.12	6.74
ENSMUSG00000056476	Med12l	mediator complex subunit 12-like [Source:MGI Symbol;Acc:MGI:2139916]	2.47015	1.3046	4.76474e-05	0.0220279	yes	up	0.02	0.35	0.3	0.17	0.26	0.2	6.96	0.36	0.65	0.55	0.49	0.48
ENSMUSG00000056749	Nfil3	nuclear factor, interleukin 3, regulated [Source:MGI Symbol;Acc:MGI:109495]	2.58345	1.3693	6.48322e-09	1.73841e-05	yes	up	3.22	11.55	7.59	5.75	6.83	13.37	5.85	18.28	29.35	26.73	29.52	19.75
ENSMUSG00000065952	Rps23rg1	ribosomal protein S23, retrogene 1 [Source:MGI Symbol;Acc:MGI:3612471]	0.415295	-1.26779	2.05467e-05	0.0119769	yes	down	2.67	4.69	4.82	7.88	9.32	4.25	1.01	3.02	2.24	1.45	3.23	3.57
ENSMUSG00000070392	Gm20634	predicted gene 20634 [Source:MGI Symbol;Acc:MGI:5313081]	2.10742	1.07548	0.000106705	0.0332697	yes	up	0.77	5.67	2.62	2.49	3.04	1.87	1.49	6.18	7.19	9.34	4.95	5.65
ENSMUSG00000081752	Sms-ps	spermine synthase, pseudogene [Source:MGI Symbol;Acc:MGI:3705601]	8.52638	3.09193	2.32299e-05	0.0129768	yes	up	0	0.3	0.17	0	0.33	0	0.49	0.65	1.68	1.95	1.58	0.37
ENSMUSG00000086610	Gm15408	predicted gene 15408 [Source:MGI Symbol;Acc:MGI:3705101]	0.218977	-2.19115	4.41248e-10	2.43128e-06	yes	down	1.2	2.57	3.22	2.73	2.6	1.94	0	0.94	0.73	0.33	0.69	0.74
ENSMUSG00000092035	Peg10	paternally expressed 10 [Source:MGI Symbol;Acc:MGI:2157785]	10.5816	3.40348	4.64426e-07	0.00069184	yes	up	0.01	0.03	0.05	0.01	0.01	0.03	0.15	0.07	0.18	0.47	0.1	0.19
ENSMUSG00000094156	Sult2a7	sulfotransferase family 2A, dehydroepiandrosterone (DHEA)-preferring, member 7 [Source:MGI Symbol;Acc:MGI:3645246]	0.226124	-2.14482	2.02418e-05	0.0119769	yes	down	7.78	233.6	90.41	49.73	72.26	33.72	5.12	25.99	15.44	6.78	30.98	19.15
ENSMUSG00000112384	Gm34921	predicted gene, 34921 [Source:MGI Symbol;Acc:MGI:5594080]	0.165694	-2.59341	8.40505e-06	0.00704291	yes	down	0.3	0.37	0.64	0.98	0.43	1.18	0	0.18	0.19	0.14	0.1	0.09
ENSMUSG00000112652	4921516A02Rik	RIKEN cDNA 4921516A02 gene [Source:MGI Symbol;Acc:MGI:3696861]	0.0200264	-5.64196	7.00595e-06	0.00626192	yes	down	0.62	0.11	0.12	0.03	0.23	1.12	0	0	0.07	0	0	0
ENSMUSG00000116270	Gm1600	predicted gene 1600 [Source:MGI Symbol;Acc:MGI:2686446]	0.301241	-1.73101	0.000153846	0.0448393	yes	down	0.17	0.23	4.87	1.05	1.88	3.09	0.01	0.73	0.09	0.86	0.04	2.75

## Sheet: Con_VS_M
Table S2. The detailed information of DEG in Con vs. M.
Gene_id	Gene name	Gene description	FC(M/Con)	Log2FC(M/Con)	Pvalue	Padjust	Significant	Regulate	Con_10	Con_2	Con_3	Con_7	Con_8	Con_9	M_3	M_4	M_6	M_7	M_8	M_9	Con	M
ENSMUSG00000002068	Ccne1	cyclin E1 [Source:MGI Symbol;Acc:MGI:88316]	4.65133	2.21764	2.96829e-07	0.000122141	yes	up	0.11	0.25	0.06	0.21	0.41	0.28	0.15	0.7	1	1.12	1.71	2.05	0.22	1.12167
ENSMUSG00000005125	Ndrg1	N-myc downstream regulated gene 1 [Source:MGI Symbol;Acc:MGI:1341799]	0.417237	-1.26106	4.67662e-06	0.00094863	yes	down	3.96	25.99	20.86	11.02	10.59	12.32	1.33	9	6.65	7.03	5.75	6.01	14.1233	5.96167
ENSMUSG00000006587	Snai3	snail family zinc finger 3 [Source:MGI Symbol;Acc:MGI:1353563]	6.65022	2.7334	2.24734e-07	9.80795e-05	yes	up	0	0.12	0.12	0.15	0.23	0.04	0.35	0.4	0.77	0.71	0.64	1.25	0.11	0.686667
ENSMUSG00000006641	Slc5a6	solute carrier family 5 (sodium-dependent vitamin transporter), member 6 [Source:MGI Symbol;Acc:MGI:2660847]	2.75803	1.46364	2.4657e-09	2.21943e-06	yes	up	0.72	2.35	2.05	3.24	2.99	3.07	1.99	4.91	5.5	11.59	7.74	9.01	2.40333	6.79
ENSMUSG00000015357	Clpx	caseinolytic mitochondrial matrix peptidase chaperone subunit [Source:MGI Symbol;Acc:MGI:1346017]	0.300644	-1.73387	1.59426e-06	0.00043163	yes	down	11.75	110.3	118.46	54.98	71.5	88.84	4.36	37.76	26.95	20.44	22.9	23.3	75.9717	22.6183
ENSMUSG00000020123	Avpr1a	arginine vasopressin receptor 1A [Source:MGI Symbol;Acc:MGI:1859216]	0.478466	-1.06351	0.000247001	0.0215594	yes	down	4.45	31.07	29.34	22.48	26.07	22.72	1.53	21.49	10.72	13.22	8.91	10.64	22.6883	11.085
ENSMUSG00000020175	Rab36	RAB36, member RAS oncogene family [Source:MGI Symbol;Acc:MGI:1924127]	0.454346	-1.13814	0.000573013	0.0404536	yes	down	2.75	7.88	9.85	6.89	6.62	5.47	0.69	4.02	6.19	5.4	1.15	2.57	6.57667	3.33667
ENSMUSG00000020182	Ddc	dopa decarboxylase [Source:MGI Symbol;Acc:MGI:94876]	0.379448	-1.39803	4.29932e-07	0.000158766	yes	down	17.09	31.47	38.63	29.15	39.59	33.97	5.53	24.49	14.09	11.15	9.32	9.61	31.65	12.365
ENSMUSG00000020572	Nampt	nicotinamide phosphoribosyltransferase [Source:MGI Symbol;Acc:MGI:1929865]	2.19862	1.1366	4.66789e-10	5.60225e-07	yes	up	4.44	11.25	10.16	9.46	10.7	9.7	5.96	16.95	17.58	28.51	30.64	27.6	9.285	21.2067
ENSMUSG00000020642	Rnf144a	ring finger protein 144A [Source:MGI Symbol;Acc:MGI:1344401]	0.403111	-1.31075	0.000265865	0.0227916	yes	down	0.56	3	3.12	1.7	2.08	2.17	0.13	1	1.23	0.86	0.85	0.69	2.105	0.793333
ENSMUSG00000020893	Per1	period circadian clock 1 [Source:MGI Symbol;Acc:MGI:1098283]	5.21874	2.3837	7.63294e-08	3.92606e-05	yes	up	0.97	6.87	2.26	0.74	1.61	1.34	5.34	10.74	8.43	14.55	13.61	12.51	2.29833	10.8633
ENSMUSG00000021281	Tnfaip2	tumor necrosis factor, alpha-induced protein 2 [Source:MGI Symbol;Acc:MGI:104960]	0.487103	-1.0377	2.24657e-09	2.157e-06	yes	down	6.1	9.91	9.93	12.11	16.02	15.27	1.92	9.95	6.73	6.46	4.69	7	11.5567	6.125
ENSMUSG00000022388	Ttll8	tubulin tyrosine ligase-like family, member 8 [Source:MGI Symbol;Acc:MGI:1922902]	7.19942	2.84788	0.000714062	0.0476107	yes	up	0	0.02	0	0.02	0.08	0.06	0.03	0.21	0.04	0.28	0.51	0.68	0.03	0.291667
ENSMUSG00000022389	Tef	thyrotroph embryonic factor [Source:MGI Symbol;Acc:MGI:98663]	2.78214	1.4762	1.97597e-06	0.000508178	yes	up	17.19	15.85	18.37	28.05	23.51	16.99	29.96	53.09	48.48	73.17	67.7	66.88	19.9933	56.5467
ENSMUSG00000022512	Cldn1	claudin 1 [Source:MGI Symbol;Acc:MGI:1276109]	0.39521	-1.33931	3.83844e-05	0.00536711	yes	down	16.21	33.95	27.97	23.08	25.9	19.11	3.81	20.67	14.79	8.41	6.32	5.81	24.37	9.96833
ENSMUSG00000023087	Noct	nocturnin [Source:MGI Symbol;Acc:MGI:109382]	3.48793	1.80237	1.02619e-11	2.11131e-08	yes	up	2.12	6.13	3.75	1.83	4.1	3.21	12.56	11.51	15.58	37.74	22.73	23.55	3.52333	20.6117
ENSMUSG00000023243	Kcnk5	potassium channel, subfamily K, member 5 [Source:MGI Symbol;Acc:MGI:1336175]	2.41382	1.27132	4.79896e-08	2.5598e-05	yes	up	2.49	8.77	8.99	8.18	8.99	4.48	2.49	20.77	15.49	24.8	21.21	17.26	6.98333	17.0033
ENSMUSG00000024042	Sik1	salt inducible kinase 1 [Source:MGI Symbol;Acc:MGI:104754]	2.81868	1.49502	2.36644e-08	1.44296e-05	yes	up	0.56	2.81	2.41	1.35	2.69	3.2	1.98	4.79	4.62	10.94	6.51	7.14	2.17	5.99667
ENSMUSG00000025185	Loxl4	lysyl oxidase-like 4 [Source:MGI Symbol;Acc:MGI:1914823]	0.380938	-1.39237	0.000168749	0.0163109	yes	down	0.26	3.35	2.19	1.37	1.5	1.93	0.1	1.01	0.69	0.85	1.03	0.53	1.76667	0.701667
ENSMUSG00000025511	Tspan4	tetraspanin 4 [Source:MGI Symbol;Acc:MGI:1928097]	2.08272	1.05847	9.38266e-06	0.00173242	yes	up	12.65	45.58	38.18	46.42	37.69	39.64	15.61	59.6	64.57	97.09	105.81	134.8	36.6933	79.58
ENSMUSG00000025981	Coq10b	coenzyme Q10B [Source:MGI Symbol;Acc:MGI:1915126]	4.54972	2.18578	2.79735e-12	1.00719e-08	yes	up	7.18	9.9	6.55	6.46	7.25	6.36	13.18	23.21	27.99	54.38	51.8	53.53	7.28333	37.3483
ENSMUSG00000026077	Npas2	neuronal PAS domain protein 2 [Source:MGI Symbol;Acc:MGI:109232]	0.0589965	-4.08323	2.55513e-08	1.47196e-05	yes	down	0.18	1.94	1.49	0.28	0.88	1.07	0.04	0.14	0.09	0	0	0.02	0.973333	0.0483333
ENSMUSG00000026435	Slc45a3	solute carrier family 45, member 3 [Source:MGI Symbol;Acc:MGI:1922082]	0.477048	-1.06779	0.000719793	0.0477717	yes	down	3.16	17.7	17.29	9.98	13.9	12.89	0.93	13.04	4.7	4.91	6.72	6.8	12.4867	6.18333
ENSMUSG00000026489	Coq8a	coenzyme Q8A [Source:MGI Symbol;Acc:MGI:1914676]	0.381626	-1.38977	2.95246e-06	0.00067316	yes	down	30.98	224.26	249.4	224.45	261.93	220.55	10.84	149.85	110.85	73.72	59.17	47.66	201.928	75.3483
ENSMUSG00000026566	Mpzl1	myelin protein zero-like 1 [Source:MGI Symbol;Acc:MGI:1915731]	0.436151	-1.1971	7.67233e-09	5.81563e-06	yes	down	1.18	3.77	4.17	2.85	3.99	4.68	0.34	1.96	1.48	1.96	1.94	1.81	3.44	1.58167
ENSMUSG00000026691	Fmo3	flavin containing monooxygenase 3 [Source:MGI Symbol;Acc:MGI:1100496]	2.1265	1.08848	0.000499081	0.0361194	yes	up	11.3	83.73	109.05	98.96	85.44	100.44	25.8	185.55	156.24	240.14	157.42	300.64	81.4867	177.632
ENSMUSG00000026773	Pfkfb3	6-phosphofructo-2-kinase/fructose-2,6-biphosphatase 3 [Source:MGI Symbol;Acc:MGI:2181202]	3.34559	1.74226	4.45517e-05	0.00599657	yes	up	0.83	3.02	3.24	1.61	1.81	1.29	0.79	3.89	3.05	13.49	8.32	8.67	1.96667	6.36833
ENSMUSG00000027068	Dhrs9	dehydrogenase/reductase (SDR family) member 9 [Source:MGI Symbol;Acc:MGI:2442798]	0.233748	-2.09697	1.61839e-06	0.00043163	yes	down	0.22	1.44	0.84	0.54	1.02	2.82	0.05	0.54	0.2	0.3	0.21	0.1	1.14667	0.233333
ENSMUSG00000027253	Lrp4	low density lipoprotein receptor-related protein 4 [Source:MGI Symbol;Acc:MGI:2442252]	2.32934	1.21992	3.41023e-10	4.46492e-07	yes	up	0.89	1.94	2.72	2.79	1.95	2.3	1.42	4.59	4.03	6.38	6.9	7.43	2.09833	5.125
ENSMUSG00000027605	Acss2	acyl-CoA synthetase short-chain family member 2 [Source:MGI Symbol;Acc:MGI:1890410]	0.417531	-1.26004	8.16071e-05	0.0100453	yes	down	22.48	67.98	166.67	107.96	136.13	135.9	11.8	54.62	43.38	73.31	33.85	53.53	106.187	45.0817
ENSMUSG00000028240	Cyp7a1	cytochrome P450, family 7, subfamily a, polypeptide 1 [Source:MGI Symbol;Acc:MGI:106091]	2.31523	1.21115	0.000336323	0.0272119	yes	up	2.2	13.23	10.93	16.27	26.9	10.33	4.71	14.1	30.38	58.43	29.86	47.76	13.31	30.8733
ENSMUSG00000028655	Mfsd2a	major facilitator superfamily domain containing 2A [Source:MGI Symbol;Acc:MGI:1923824]	3.23439	1.69349	7.9722e-07	0.000239199	yes	up	16.41	54.63	58.4	20.94	20.11	26.78	42.78	82.98	61.23	126.84	147.93	139.55	32.8783	100.218
ENSMUSG00000028957	Per3	period circadian clock 3 [Source:MGI Symbol;Acc:MGI:1277134]	6.62715	2.72839	2.22089e-07	9.80795e-05	yes	up	1.25	0.27	0.46	0.84	1.45	0.44	5	3.57	4.48	8.66	5.59	6.85	0.785	5.69167
ENSMUSG00000029188	Slc34a2	solute carrier family 34 (sodium phosphate), member 2 [Source:MGI Symbol;Acc:MGI:1342284]	0.190237	-2.39413	2.2174e-08	1.44296e-05	yes	down	0.2	1.17	2.29	0.63	1.13	1.57	0.01	0.31	0.25	0.34	0.18	0.28	1.165	0.228333
ENSMUSG00000029482	Aacs	acetoacetyl-CoA synthetase [Source:MGI Symbol;Acc:MGI:1926144]	2.25343	1.17212	0.000140846	0.0141851	yes	up	3.79	14.56	14.09	9.55	12.48	8.06	10.14	22.04	16.35	51.24	31.45	29.21	10.4217	26.7383
ENSMUSG00000029591	Ung	uracil DNA glycosylase [Source:MGI Symbol;Acc:MGI:109352]	2.23998	1.16349	8.48444e-05	0.0100986	yes	up	1.54	2.35	1.76	3.39	4.51	5.52	1.99	6.22	7.21	7.82	12.77	11.26	3.17833	7.87833
ENSMUSG00000029657	Hsph1	heat shock 105kDa/110kDa protein 1 [Source:MGI Symbol;Acc:MGI:105053]	2.41326	1.27098	0.000673659	0.0457644	yes	up	1.2	9.01	4.95	4.35	8.04	5.7	1.6	21.86	6	18.04	16.6	25.57	5.54167	14.945
ENSMUSG00000030244	Gys2	glycogen synthase 2 [Source:MGI Symbol;Acc:MGI:2385254]	2.36518	1.24195	8.6439e-13	4.14965e-09	yes	up	34.13	59.55	57.26	53.14	52.65	40.05	50.85	84.78	151.79	138.12	142.44	129.52	49.4633	116.25
ENSMUSG00000030257	Srgap3	SLIT-ROBO Rho GTPase activating protein 3 [Source:MGI Symbol;Acc:MGI:2152938]	0.434531	-1.20247	1.33757e-07	6.42121e-05	yes	down	0.23	0.48	0.48	0.46	0.65	0.34	0.06	0.36	0.16	0.26	0.32	0.3	0.44	0.243333
ENSMUSG00000030762	Aqp8	aquaporin 8 [Source:MGI Symbol;Acc:MGI:1195271]	0.431793	-1.21159	1.01151e-05	0.00181569	yes	down	73.34	104.53	125.89	127.91	95.4	167.02	33.43	52.74	72.95	58.28	28.83	40.29	115.682	47.7533
ENSMUSG00000031016	Wee1	WEE 1 homolog 1 (S. pombe) [Source:MGI Symbol;Acc:MGI:103075]	6.58182	2.71849	1.16467e-16	8.38676e-13	yes	up	0.19	0.54	0.74	1.16	1.08	0.54	0.89	3	4.07	6.71	7.33	6.08	0.708333	4.68
ENSMUSG00000031024	Denn2b	DENN domain containing 2B [Source:MGI Symbol;Acc:MGI:108517]	0.431224	-1.21349	2.44025e-06	0.000605939	yes	down	16.39	24.39	19.86	13.09	16.9	14.42	6.24	14.56	7.4	5.39	8.4	9.13	17.5083	8.52
ENSMUSG00000032010	Usp2	ubiquitin specific peptidase 2 [Source:MGI Symbol;Acc:MGI:1858178]	16.4227	4.03762	3.48972e-28	5.02589e-24	yes	up	0.77	0.84	1.38	2.76	1.1	1.15	8.21	14.47	13.82	31.68	39.53	34.18	1.33333	23.6483
ENSMUSG00000032311	Nrg4	neuregulin 4 [Source:MGI Symbol;Acc:MGI:1933833]	3.95184	1.98253	6.04415e-07	0.000197836	yes	up	1.49	4.37	3.82	3.82	1.85	4.07	5.99	4.45	6.81	12.48	14.6	21.49	3.23667	10.97
ENSMUSG00000032786	Alas1	aminolevulinic acid synthase 1 [Source:MGI Symbol;Acc:MGI:87989]	5.48115	2.45448	1.40839e-08	1.01418e-05	yes	up	34.36	448.56	318.62	115.03	141.5	120.16	76.93	629.18	578.5	1907.08	1594.07	2086.69	196.372	1145.41
ENSMUSG00000033066	Gas7	growth arrest specific 7 [Source:MGI Symbol;Acc:MGI:1202388]	0.469525	-1.09072	0.000343716	0.0274321	yes	down	0.46	1.88	2.05	1.26	1.5	1.73	0.25	0.92	1.14	0.62	0.46	0.5	1.48	0.648333
ENSMUSG00000035498	Cdcp1	CUB domain containing protein 1 [Source:MGI Symbol;Acc:MGI:2442010]	0.424127	-1.23743	5.36869e-06	0.00104486	yes	down	2.56	1.85	2.66	1.36	2.51	1.33	0.36	1.06	1.25	0.62	0.45	0.71	2.045	0.741667
ENSMUSG00000035828	Pim3	proviral integration site 3 [Source:MGI Symbol;Acc:MGI:1355297]	2.38957	1.25675	1.71646e-05	0.00277758	yes	up	23.66	19.73	20.61	18.31	25.37	15.68	42.01	44.83	21.72	58.61	56.62	54.43	20.56	46.37
ENSMUSG00000036957	Lrfn3	leucine rich repeat and fibronectin type III domain containing 3 [Source:MGI Symbol;Acc:MGI:2442512]	0.362119	-1.46546	9.97283e-06	0.00181569	yes	down	1.1	4.01	6.52	3.67	4.95	4.19	0.29	3.64	1.21	1.58	1.1	1.22	4.07333	1.50667
ENSMUSG00000037071	Scd1	stearoyl-Coenzyme A desaturase 1 [Source:MGI Symbol;Acc:MGI:98239]	0.406205	-1.29972	2.40258e-07	0.00010177	yes	down	371.48	1151.41	1536.87	1036.89	1150.51	1743.27	70.83	535.89	507.99	748.72	543.11	613.99	1165.07	503.422
ENSMUSG00000038550	Ciart	circadian associated repressor of transcription [Source:MGI Symbol;Acc:MGI:2684975]	22.9647	4.52135	6.91051e-12	1.9905e-08	yes	up	0.81	0.18	0.03	0.83	1.34	0.55	13	7.27	6.24	16.52	20.85	17.04	0.623333	13.4867
ENSMUSG00000038754	Elovl3	elongation of very long chain fatty acids (FEN1/Elo2, SUR4/Elo3, yeast)-like 3 [Source:MGI Symbol;Acc:MGI:1195976]	0.317008	-1.65741	3.5609e-05	0.00507763	yes	down	0.97	5.97	8.26	3.73	6.41	1.94	0.13	1.6	1.08	1.95	1.53	2.66	4.54667	1.49167
ENSMUSG00000039157	Fam102a	family with sequence similarity 102, member A [Source:MGI Symbol;Acc:MGI:2138935]	2.13863	1.09669	1.70572e-05	0.00277758	yes	up	2.51	5.09	7.71	7.45	7.64	3.58	3.41	9.07	5.92	17.28	13.36	17.88	5.66333	11.1533
ENSMUSG00000039220	Ppp1r10	protein phosphatase 1, regulatory subunit 10 [Source:MGI Symbol;Acc:MGI:1289273]	2.4224	1.27644	0.000466916	0.0344848	yes	up	2.53	15.62	12.41	4.3	4.25	6.92	2.57	14.76	16.17	27.9	12.33	30.93	7.67167	17.4433
ENSMUSG00000039620	Trmt9b	tRNA methyltransferase 9B [Source:MGI Symbol;Acc:MGI:2442328]	0.432004	-1.21088	1.97274e-08	1.35293e-05	yes	down	1.37	2.84	2.92	2.15	3.44	3.67	0.68	1.31	1.53	1.03	1.61	1.69	2.73167	1.30833
ENSMUSG00000039633	Lonrf1	LON peptidase N-terminal domain and ring finger 1 [Source:MGI Symbol;Acc:MGI:3609241]	2.55419	1.35287	0.000341646	0.0274321	yes	up	0.08	0.53	0.4	0.62	0.79	0.93	0.2	1.09	1.18	1.98	2.16	2.16	0.558333	1.46167
ENSMUSG00000039982	Dtx4	deltex 4, E3 ubiquitin ligase [Source:MGI Symbol;Acc:MGI:2672905]	0.427155	-1.22717	2.48e-10	3.5717e-07	yes	down	1.14	5.47	5.61	4.72	4.64	4.91	0.46	2.75	2.44	2.31	1.99	1.91	4.415	1.97667
ENSMUSG00000040675	Mthfd1l	methylenetetrahydrofolate dehydrogenase (NADP+ dependent) 1-like [Source:MGI Symbol;Acc:MGI:1924836]	3.33103	1.73597	8.45099e-05	0.0100986	yes	up	0.06	0.21	0.25	0.31	0.26	0.21	0.2	0.31	0.47	0.71	1.55	1.11	0.216667	0.725
ENSMUSG00000042363	Lgalsl	lectin, galactoside binding-like [Source:MGI Symbol;Acc:MGI:1916114]	0.438237	-1.19022	7.38597e-06	0.00139964	yes	down	1.42	7.94	5.96	5.27	6.04	5.68	0.36	4.39	2.22	2.43	2.47	3.36	5.385	2.53833
ENSMUSG00000042510	AA986860	expressed sequence AA986860 [Source:MGI Symbol;Acc:MGI:2138143]	2.92701	1.54943	8.84441e-05	0.0102724	yes	up	0.81	0.59	0.73	1.05	0.69	1.04	0.58	3.17	1.08	3.34	2.86	2.6	0.818333	2.27167
ENSMUSG00000043068	Fam89a	family with sequence similarity 89, member A [Source:MGI Symbol;Acc:MGI:1916877]	0.46035	-1.1192	3.62841e-06	0.000779945	yes	down	5.78	5.04	8.19	11.54	9.66	9.14	2.55	4.43	4.22	4.49	2.48	4.49	8.225	3.77667
ENSMUSG00000048489	Depp1	DEPP1 autophagy regulator [Source:MGI Symbol;Acc:MGI:1918730]	0.436774	-1.19504	5.038e-06	0.00100774	yes	down	32.21	44.41	48.34	72.07	81.42	52.18	11.93	29.86	31.05	17.82	30.99	18.65	55.105	23.3833
ENSMUSG00000049580	Tsku	tsukushi, small leucine rich proteoglycan [Source:MGI Symbol;Acc:MGI:2443855]	7.64637	2.93477	1.27831e-11	2.30128e-08	yes	up	2.79	5.75	7.29	5.02	7.09	7.33	19.75	24.08	6.54	73.1	68.34	71.36	5.87833	43.8617
ENSMUSG00000052040	Klf13	Kruppel-like factor 13 [Source:MGI Symbol;Acc:MGI:1354948]	2.20833	1.14296	0.000145129	0.014316	yes	up	4.06	8.53	10.8	8.66	11.75	6.32	4.28	23.47	12.68	22.71	24.46	21.05	8.35333	18.1083
ENSMUSG00000052632	Asap2	ArfGAP with SH3 domain, ankyrin repeat and PH domain 2 [Source:MGI Symbol;Acc:MGI:2685438]	0.276322	-1.85558	6.44802e-10	7.14341e-07	yes	down	2.05	3.77	5.23	3.47	5.78	3.84	0.69	1.89	1.56	0.98	0.67	0.85	4.02333	1.10667
ENSMUSG00000053219	Raet1e	retinoic acid early transcript 1E [Source:MGI Symbol;Acc:MGI:2675273]	0.41615	-1.26482	2.4046e-08	1.44296e-05	yes	down	8.41	11.06	14.93	12.43	14.07	8.21	1.27	5.87	5.74	6.29	5.13	2.85	11.5183	4.525
ENSMUSG00000055116	Arntl	aryl hydrocarbon receptor nuclear translocator-like [Source:MGI Symbol;Acc:MGI:1096381]	0.138521	-2.85182	7.3528e-09	5.81563e-06	yes	down	1.12	8.85	6.87	3.47	4.94	6.49	0.22	2.4	0.46	0.47	0.36	0.35	5.29	0.71
ENSMUSG00000055866	Per2	period circadian clock 2 [Source:MGI Symbol;Acc:MGI:1195265]	4.66351	2.22142	2.72414e-06	0.000653885	yes	up	4.47	1.32	1.99	1.36	1.68	0.96	5.39	3.52	4.22	8.59	5.15	6.64	1.96333	5.585
ENSMUSG00000057342	Sphk2	sphingosine kinase 2 [Source:MGI Symbol;Acc:MGI:1861380]	0.475781	-1.07163	2.42781e-05	0.00370156	yes	down	11.6	19.33	28.33	29.66	36.53	29.1	4.98	23.11	11.67	11.14	10.07	9.99	25.7583	11.8267
ENSMUSG00000059824	Dbp	D site albumin promoter binding protein [Source:MGI Symbol;Acc:MGI:94866]	4.56459	2.19049	0.000478881	0.035188	yes	up	49.05	3.5	9.24	56.6	48.27	15.63	148.59	82.96	159.72	162.52	130.51	121.86	30.3817	134.36
ENSMUSG00000064254	Ethe1	ethylmalonic encephalopathy 1 [Source:MGI Symbol;Acc:MGI:1913321]	0.341985	-1.548	4.68148e-07	0.000168557	yes	down	10.67	86.4	159.98	129.79	150.32	153.93	6.36	43.51	60.16	36.77	33.55	32.8	115.182	35.525
ENSMUSG00000066441	Rdh11	retinol dehydrogenase 11 [Source:MGI Symbol;Acc:MGI:102581]	0.475972	-1.07105	1.31157e-06	0.000363255	yes	down	8.55	21.03	35.2	27.4	32.57	23.58	3.71	19.35	11.52	16.27	10.4	10.57	24.7217	11.97
ENSMUSG00000074063	Osgin1	oxidative stress induced growth inhibitor 1 [Source:MGI Symbol;Acc:MGI:1919089]	0.493589	-1.01862	0.000678585	0.0458825	yes	down	119.04	100.59	133.45	134.26	176.57	130.4	41.18	82.39	45.72	67.1	76.2	84.76	132.385	66.225
ENSMUSG00000074183	Gsta1	glutathione S-transferase, alpha 1 (Ya) [Source:MGI Symbol;Acc:MGI:1095417]	0.187203	-2.41733	0.00033026	0.0268723	yes	down	0.89	0.45	1.1	1.32	4	8.57	0.06	0.42	0.84	0.43	0.78	0.59	2.72167	0.52
ENSMUSG00000074254	Cyp2a4	cytochrome P450, family 2, subfamily a, polypeptide 4 [Source:MGI Symbol;Acc:MGI:88596]	2.47425	1.30699	8.82778e-05	0.0102724	yes	up	244.89	143.09	211.14	189.71	186.26	234.53	169.31	522.91	509.69	918.08	757.7	768.13	201.603	607.637
ENSMUSG00000074521	Gm14327	predicted gene 14327 [Source:MGI Symbol;Acc:MGI:3652188]	2.13852	1.09661	5.7126e-05	0.00741197	yes	up	1.85	2.7	2.58	3.03	2.49	2.94	2.35	5.94	3.25	5	7.1	7.28	2.59833	5.15333
ENSMUSG00000074622	Mafb	v-maf musculoaponeurotic fibrosarcoma oncogene family, protein B (avian) [Source:MGI Symbol;Acc:MGI:104555]	2.53749	1.3434	3.03806e-09	2.57377e-06	yes	up	5.76	21.96	18.26	13.27	21.47	15.49	8.12	44.34	34.82	74.43	55.56	38.9	16.035	42.695
ENSMUSG00000074768	Bhmt	betaine-homocysteine methyltransferase [Source:MGI Symbol;Acc:MGI:1339972]	0.375174	-1.41437	4.07266e-05	0.00558614	yes	down	632.44	1232.79	2516.74	1066.3	1706.77	1156.14	302.45	739.09	661.8	436.51	204.12	466.84	1385.2	468.468
ENSMUSG00000076614	Ighg1	immunoglobulin heavy constant gamma 1 (G1m marker) [Source:MGI Symbol;Acc:MGI:96446]	4.43494	2.14891	0.000185577	0.0173551	yes	up	0.29	0.85	0.55	0.87	1.03	1.33	3.88	1.27	1.08	1.87	4.56	3.31	0.82	2.66167
ENSMUSG00000078901	Gm14440	predicted gene 14440 [Source:MGI Symbol;Acc:MGI:3702430]	0.0127099	-6.29791	3.23578e-07	0.000129449	yes	down	0.42	0	0.41	0.19	0.39	0.34	0	0	0	0	0	0.02	0.291667	0.00333333
ENSMUSG00000085971	Gm15411	predicted gene 15411 [Source:MGI Symbol;Acc:MGI:3705213]	2.97316	1.572	0.000600466	0.0419802	yes	up	0.42	0.07	0.3	0.09	0.11	0.03	0.19	0.12	0.17	0.3	0.46	0.3	0.17	0.256667
ENSMUSG00000089712	Gm15889	predicted gene 15889 [Source:MGI Symbol;Acc:MGI:3802159]	3.07558	1.62086	0.000174961	0.0167986	yes	up	0.26	2.31	1.3	0.63	0.69	0.53	2.29	3.7	2.33	2.15	3.92	2.12	0.953333	2.75167
ENSMUSG00000089809	Rasgef1b	RasGEF domain family, member 1B [Source:MGI Symbol;Acc:MGI:2443755]	2.30863	1.20704	2.15588e-05	0.0033386	yes	up	1.33	8.32	4.84	3.58	3.28	3.55	2.29	7.72	10.38	14.31	13.51	9.67	4.15	9.64667
ENSMUSG00000090622	A930033H14Rik	RIKEN cDNA A930033H14 gene [Source:MGI Symbol;Acc:MGI:2444562]	7.09394	2.82659	1.90631e-06	0.000499176	yes	up	0.25	0.16	0.23	0.23	0.25	0.1	1.78	0.78	0.74	1.83	0.84	1.1	0.203333	1.17833
ENSMUSG00000094156	Sult2a7	sulfotransferase family 2A, dehydroepiandrosterone (DHEA)-preferring, member 7 [Source:MGI Symbol;Acc:MGI:3645246]	0.202652	-2.30293	0.000346663	0.0274321	yes	down	7.78	233.6	90.41	49.73	72.26	33.72	3.51	0.74	33.77	14.58	19.47	16.41	81.25	14.7467
ENSMUSG00000094793	Mup12	major urinary protein 12 [Source:MGI Symbol;Acc:MGI:3780193]	0.350981	-1.51054	2.381e-06	0.000601599	yes	down	20.75	14.65	23.31	17.89	21.67	14.01	3.02	7.71	8.54	8.91	5.69	9.14	18.7133	7.16833
ENSMUSG00000095455	Mup-ps3	major urinary protein, pseudogene 3 [Source:MGI Symbol;Acc:MGI:3650796]	0.22943	-2.12387	0.000255996	0.0222099	yes	down	27.54	9.01	24.41	29.31	56.08	20.83	4.25	8.86	5.54	16.81	1.14	3.11	27.8633	6.61833
ENSMUSG00000103313	Gm38357	predicted gene, 38357 [Source:MGI Symbol;Acc:MGI:5611585]	8.38962	3.06861	0.000106169	0.0116721	yes	up	0.02	0.05	0.03	0	0.02	0.05	0.02	0.23	0.14	0.47	0.15	0.52	0.0283333	0.255
ENSMUSG00000109904	Gm45819	predicted gene 45819 [Source:MGI Symbol;Acc:MGI:5804934]	24.4462	4.61154	4.45727e-06	0.000917051	yes	up	0	0	0.08	0.03	0	0.04	0	0.3	0.57	0.69	0.96	1.3	0.025	0.636667
ENSMUSG00000112109	Gm30906	predicted gene, 30906 [Source:MGI Symbol;Acc:MGI:5590065]	0.214953	-2.2179	4.94268e-11	7.90939e-08	yes	down	2.57	5.69	6.01	6.88	5.76	5.91	0.3	2.23	2.31	1.32	0.46	0.84	5.47	1.24333

## Sheet: Con_VS_H
Table S2. The detailed information of DEG in Con vs. H.
Gene_id	Gene name	Gene description	FC(H/Con)	Log2FC(H/Con)	Pvalue	P-adjust	Significant	Regulate	Con_10	Con_2	Con_3	Con_7	Con_8	Con_9	H_1	H_2	H_4	H_6	H_8	H_9
ENSMUSG00000000791	Il12rb1	interleukin 12 receptor, beta 1 [Source:MGI Symbol;Acc:MGI:104579]	2.82663	1.49908	8.6626e-05	0.00598859	yes	up	0.06	0.13	0.51	0.24	0.21	0.24	0.57	0.21	0.39	11.72	0.95	0.54
ENSMUSG00000001128	Cfp	complement factor properdin [Source:MGI Symbol;Acc:MGI:97545]	2.16899	1.11703	1.6041e-06	0.000219477	yes	up	12.77	39.53	27.46	26.73	23.4	35.34	39.54	22.86	57.27	87.39	42.3	55.83
ENSMUSG00000002068	Ccne1	cyclin E1 [Source:MGI Symbol;Acc:MGI:88316]	5.65657	2.49993	2.21835e-08	5.8276e-06	yes	up	0.11	0.25	0.06	0.21	0.41	0.28	0.74	0.2	1.76	1.2	1.21	1.47
ENSMUSG00000003721	Insig2	insulin induced gene 2 [Source:MGI Symbol;Acc:MGI:1920249]	0.365002	-1.45403	0.000694386	0.0292332	yes	down	14.94	189.95	227.96	128.04	95.79	150.49	75.51	1.65	57.29	41.63	66.04	40.99
ENSMUSG00000005125	Ndrg1	N-myc downstream regulated gene 1 [Source:MGI Symbol;Acc:MGI:1341799]	0.357211	-1.48515	2.33816e-07	4.7487e-05	yes	down	3.96	25.99	20.86	11.02	10.59	12.32	5.11	0.68	4.61	6.77	5.07	5.62
ENSMUSG00000005233	Spc25	SPC25, NDC80 kinetochore complex component, homolog (S. cerevisiae) [Source:MGI Symbol;Acc:MGI:1913692]	2.51373	1.32983	0.00020387	0.0113652	yes	up	0.56	1.18	1.02	1.49	1.03	2.31	2.17	0.37	2.83	3.09	3.61	5.49
ENSMUSG00000005514	Por	P450 (cytochrome) oxidoreductase [Source:MGI Symbol;Acc:MGI:97744]	2.14949	1.10399	0.000270007	0.0139628	yes	up	43.04	162.08	296.2	273.47	281.84	224.14	384.16	52.01	487.8	541.76	415.92	661.9
ENSMUSG00000006587	Snai3	snail family zinc finger 3 [Source:MGI Symbol;Acc:MGI:1353563]	6.65836	2.73517	1.50167e-05	0.00140889	yes	up	0	0.12	0.12	0.15	0.23	0.04	0.46	0.47	0.62	0.42	0.44	0.58
ENSMUSG00000006641	Slc5a6	solute carrier family 5 (sodium-dependent vitamin transporter), member 6 [Source:MGI Symbol;Acc:MGI:2660847]	2.81911	1.49524	5.00674e-12	4.38424e-09	yes	up	0.72	2.35	2.05	3.24	2.99	3.07	6.35	1.41	7.68	7.32	6.74	8.75
ENSMUSG00000009013	Dynll1	dynein light chain LC8-type 1 [Source:MGI Symbol;Acc:MGI:1861457]	2.05965	1.0424	2.1515e-08	5.78806e-06	yes	up	10.59	9.79	8.88	4.39	7.37	7.13	12.43	9.03	12.8	18.46	13.84	10.18
ENSMUSG00000009647	Mcu	mitochondrial calcium uniporter [Source:MGI Symbol;Acc:MGI:3026965]	0.467878	-1.09579	0.000153871	0.00919862	yes	down	9.03	8.27	8.25	7.77	10.2	10.58	5.48	2.3	4.28	3.32	5.08	2.9
ENSMUSG00000015357	Clpx	caseinolytic mitochondrial matrix peptidase chaperone subunit [Source:MGI Symbol;Acc:MGI:1346017]	0.245634	-2.02542	2.15923e-08	5.78806e-06	yes	down	11.75	110.3	118.46	54.98	71.5	88.84	25.39	2.78	16.84	19.86	19.42	16.46
ENSMUSG00000017929	B4galt5	UDP-Gal:betaGlcNAc beta 1,4-galactosyltransferase, polypeptide 5 [Source:MGI Symbol;Acc:MGI:1927169]	2.02556	1.01832	3.85996e-09	1.37029e-06	yes	up	3.32	5.68	4.12	3.54	6.59	4.85	8.83	4.02	7.55	12.59	7.59	8.83
ENSMUSG00000018906	P4ha2	procollagen-proline, 2-oxoglutarate 4-dioxygenase (proline 4-hydroxylase), alpha II polypeptide [Source:MGI Symbol;Acc:MGI:894286]	2.2205	1.15088	6.80421e-15	1.11717e-11	yes	up	0.85	2.3	2.42	1.57	2.31	2.83	5.48	1.24	3.81	4.47	5.49	4.08
ENSMUSG00000019139	Isyna1	myo-inositol 1-phosphate synthase A1 [Source:MGI Symbol;Acc:MGI:1919030]	2.57908	1.36686	0.000125034	0.00789579	yes	up	4.72	4.65	5.02	3.42	5.5	6.15	7.92	10.64	11.3	11.27	9.2	9.63
ENSMUSG00000019942	Cdk1	cyclin-dependent kinase 1 [Source:MGI Symbol;Acc:MGI:88351]	2.37211	1.24617	0.000988081	0.037728	yes	up	0.71	1.57	0.83	0.99	0.74	1.84	1.64	0.3	1.44	1.67	2.32	3.58
ENSMUSG00000019944	Rhobtb1	Rho-related BTB domain containing 1 [Source:MGI Symbol;Acc:MGI:1916538]	2.19821	1.13633	1.29163e-08	3.76124e-06	yes	up	2.41	15.96	15.73	9.69	10.14	12.07	20.2	4.79	18.95	31.51	21.17	25.56
ENSMUSG00000020037	Rfx4	regulatory factor X, 4 (influences HLA class II expression) [Source:MGI Symbol;Acc:MGI:1918387]	0.191551	-2.3842	4.35281e-09	1.466e-06	yes	down	1	4.53	4.61	3.95	5.05	2.48	1.18	0.18	0.28	0.66	1.08	0.27
ENSMUSG00000020123	Avpr1a	arginine vasopressin receptor 1A [Source:MGI Symbol;Acc:MGI:1859216]	0.404724	-1.30499	0.000110571	0.00724636	yes	down	4.45	31.07	29.34	22.48	26.07	22.72	14.43	0.26	9.97	9.56	10.31	7.94
ENSMUSG00000020175	Rab36	RAB36, member RAS oncogene family [Source:MGI Symbol;Acc:MGI:1924127]	0.315307	-1.66517	2.46474e-20	8.09358e-17	yes	down	2.75	7.88	9.85	6.89	6.62	5.47	3.37	0.2	1.27	2.48	2.95	2.14
ENSMUSG00000020182	Ddc	dopa decarboxylase [Source:MGI Symbol;Acc:MGI:94876]	0.384853	-1.37762	8.44617e-05	0.00586987	yes	down	17.09	31.47	38.63	29.15	39.59	33.97	27.23	2.58	8.48	11.02	11.89	8.53
ENSMUSG00000020381	Mrnip	MRN complex interacting protein [Source:MGI Symbol;Acc:MGI:1915317]	0.374748	-1.41601	0.000105893	0.00709643	yes	down	10.29	12.72	11.06	12.41	12.54	11.22	6.32	9.47	3.69	2.17	5.7	1.4
ENSMUSG00000020572	Nampt	nicotinamide phosphoribosyltransferase [Source:MGI Symbol;Acc:MGI:1929865]	2.89268	1.53241	3.0778e-26	1.34757e-22	yes	up	4.44	11.25	10.16	9.46	10.7	9.7	22.39	5.81	27.11	36.48	28.29	29.82
ENSMUSG00000020623	Map2k6	mitogen-activated protein kinase kinase 6 [Source:MGI Symbol;Acc:MGI:1346870]	2.76441	1.46697	2.22665e-05	0.00193689	yes	up	2.75	3.43	2.35	3.3	3.66	2.22	6.68	5.83	4.94	5.6	4.9	7.39
ENSMUSG00000020642	Rnf144a	ring finger protein 144A [Source:MGI Symbol;Acc:MGI:1344401]	0.291921	-1.77635	2.72055e-07	5.2172e-05	yes	down	0.56	3	3.12	1.7	2.08	2.17	0.78	0.09	0.55	0.58	0.6	0.54
ENSMUSG00000020644	Id2	inhibitor of DNA binding 2 [Source:MGI Symbol;Acc:MGI:96397]	0.458141	-1.12614	0.000172992	0.0100989	yes	down	44.85	152.43	150.88	143.38	157.53	118.96	100.28	4.94	60.41	55.83	79.55	42.84
ENSMUSG00000020893	Per1	period circadian clock 1 [Source:MGI Symbol;Acc:MGI:1098283]	4.37704	2.12996	3.36844e-05	0.00278267	yes	up	0.97	6.87	2.26	0.74	1.61	1.34	5.13	4.49	7.25	10.74	7.52	7.26
ENSMUSG00000021670	Hmgcr	3-hydroxy-3-methylglutaryl-Coenzyme A reductase [Source:MGI Symbol;Acc:MGI:96159]	2.43289	1.28267	1.47557e-09	6.68329e-07	yes	up	5.17	14.27	14.51	12.77	20.47	14.64	45.08	2.76	30.6	33.32	27.39	42.54
ENSMUSG00000022003	Slc25a30	solute carrier family 25, member 30 [Source:MGI Symbol;Acc:MGI:1914804]	0.41186	-1.27977	0.000437691	0.0205324	yes	down	5.65	12.36	18.75	8.97	13.37	7.82	4.31	0.33	5.26	3.95	9.01	3.84
ENSMUSG00000022218	Tgm1	transglutaminase 1, K polypeptide [Source:MGI Symbol;Acc:MGI:98730]	2.23568	1.16071	3.15634e-09	1.18453e-06	yes	up	2.53	8.32	6.63	7.55	11.03	10.84	18.83	3.81	20.55	23.75	15.17	12.1
ENSMUSG00000022347	A1bg	alpha-1-B glycoprotein [Source:MGI Symbol;Acc:MGI:2152878]	14.3818	3.84618	1.50917e-06	0.000210883	yes	up	2.15	23.92	3.18	16.55	11.09	9.8	423.6	0.67	41.95	22.98	385.34	86.35
ENSMUSG00000022353	Mtss1	MTSS I-BAR domain containing 1 [Source:MGI Symbol;Acc:MGI:2384818]	2.00506	1.00365	0.00107665	0.0401755	yes	up	20.33	29.09	29.61	24.99	34.53	25.69	47.07	22.48	40.8	67.82	57.22	47.08
ENSMUSG00000022388	Ttll8	tubulin tyrosine ligase-like family, member 8 [Source:MGI Symbol;Acc:MGI:1922902]	13.5179	3.7568	4.57972e-06	0.000541933	yes	up	0	0.02	0	0.02	0.08	0.06	0.3	0	0.51	0.68	0.98	0.91
ENSMUSG00000022389	Tef	thyrotroph embryonic factor [Source:MGI Symbol;Acc:MGI:98663]	2.87026	1.52118	1.14768e-05	0.00112498	yes	up	17.19	15.85	18.37	28.05	23.51	16.99	46.94	27.17	46.17	71.14	52.01	54.29
ENSMUSG00000022512	Cldn1	claudin 1 [Source:MGI Symbol;Acc:MGI:1276109]	0.28651	-1.80334	4.79585e-09	1.57484e-06	yes	down	16.21	33.95	27.97	23.08	25.9	19.11	14.32	2	5.44	6.49	7.79	3.23
ENSMUSG00000022615	Tymp	thymidine phosphorylase [Source:MGI Symbol;Acc:MGI:1920212]	0.348261	-1.52176	3.719e-06	0.000448157	yes	down	7.74	37.17	44.16	36.07	35.42	37.53	17.58	1.09	9.97	7.45	14.71	10.74
ENSMUSG00000022797	Tfrc	transferrin receptor [Source:MGI Symbol;Acc:MGI:98822]	2.73571	1.45192	1.00977e-05	0.00105265	yes	up	0.98	1.83	2.74	0.73	1.41	2.98	4.56	0.99	3.46	9.26	3.77	5.81
ENSMUSG00000023078	Cxcl13	chemokine (C-X-C motif) ligand 13 [Source:MGI Symbol;Acc:MGI:1888499]	4.40696	2.13979	0.000442031	0.0205941	yes	up	0.09	4.24	2.53	3.77	3.45	4.68	8.99	0.83	14.11	38.1	4.25	12.15
ENSMUSG00000023087	Noct	nocturnin [Source:MGI Symbol;Acc:MGI:109382]	2.36372	1.24106	2.75552e-07	5.2172e-05	yes	up	2.12	6.13	3.75	1.83	4.1	3.21	9.28	5.06	11.45	22.45	13.38	16.61
ENSMUSG00000023243	Kcnk5	potassium channel, subfamily K, member 5 [Source:MGI Symbol;Acc:MGI:1336175]	2.25672	1.17423	1.76626e-06	0.000238265	yes	up	2.49	8.77	8.99	8.18	8.99	4.48	11.69	2.17	10.27	16.66	18.89	23.32
ENSMUSG00000023913	Pla2g7	phospholipase A2, group VII (platelet-activating factor acetylhydrolase, plasma) [Source:MGI Symbol;Acc:MGI:1351327]	2.41111	1.2697	0.000424666	0.0202836	yes	up	0.31	4.47	2.4	1.69	1.83	2.2	5.13	0.51	6.44	6.68	3.64	4.18
ENSMUSG00000024042	Sik1	salt inducible kinase 1 [Source:MGI Symbol;Acc:MGI:104754]	2.57007	1.36181	2.20377e-06	0.000289465	yes	up	0.56	2.81	2.41	1.35	2.69	3.2	3.41	0.85	6.38	6.24	6.18	7.14
ENSMUSG00000024222	Fkbp5	FK506 binding protein 5 [Source:MGI Symbol;Acc:MGI:104670]	3.18839	1.67283	3.31329e-07	5.96166e-05	yes	up	2.11	23.12	20.06	13.68	16.67	15.59	36.73	6.38	54.22	53.25	56.26	54.33
ENSMUSG00000024987	Cyp26a1	cytochrome P450, family 26, subfamily a, polypeptide 1 [Source:MGI Symbol;Acc:MGI:1096359]	0.353255	-1.50122	0.000108278	0.00721942	yes	down	7.04	20.89	33.94	23.82	56.93	27.97	21.44	1.21	11.22	6.79	9.57	5.23
ENSMUSG00000025185	Loxl4	lysyl oxidase-like 4 [Source:MGI Symbol;Acc:MGI:1914823]	0.270616	-1.88568	4.78416e-06	0.000561071	yes	down	0.26	3.35	2.19	1.37	1.5	1.93	0.79	0.04	0.39	0.28	0.53	0.47
ENSMUSG00000025504	Eps8l2	EPS8-like 2 [Source:MGI Symbol;Acc:MGI:2138828]	0.419313	-1.2539	1.56301e-07	3.47969e-05	yes	down	24.86	32.61	35.76	30.81	35.18	33.86	17.93	8.81	9.44	10.65	12.58	9.75
ENSMUSG00000025511	Tspan4	tetraspanin 4 [Source:MGI Symbol;Acc:MGI:1928097]	2.39707	1.26127	5.0856e-11	3.33997e-08	yes	up	12.65	45.58	38.18	46.42	37.69	39.64	59.93	16.05	101.12	114.15	90.75	96.24
ENSMUSG00000025981	Coq10b	coenzyme Q10B [Source:MGI Symbol;Acc:MGI:1915126]	4.61418	2.20607	2.69133e-14	3.92784e-11	yes	up	7.18	9.9	6.55	6.46	7.25	6.36	27.9	7	45.37	44.44	42.67	41.09
ENSMUSG00000026077	Npas2	neuronal PAS domain protein 2 [Source:MGI Symbol;Acc:MGI:109232]	0.0270101	-5.21036	1.21796e-13	1.28991e-10	yes	down	0.18	1.94	1.49	0.28	0.88	1.07	0.07	0	0.02	0.03	0.01	0.2
ENSMUSG00000026390	Marco	macrophage receptor with collagenous structure [Source:MGI Symbol;Acc:MGI:1309998]	4.82339	2.27005	0.000200661	0.0113119	yes	up	1.07	22.82	7.8	5.9	13.02	19.7	32.28	2.27	44.42	179.03	24.2	51.3
ENSMUSG00000026435	Slc45a3	solute carrier family 45, member 3 [Source:MGI Symbol;Acc:MGI:1922082]	0.476293	-1.07008	0.000436044	0.0205324	yes	down	3.16	17.7	17.29	9.98	13.9	12.89	7.33	0.55	3.84	6.36	8.25	6.85
ENSMUSG00000026489	Coq8a	coenzyme Q8A [Source:MGI Symbol;Acc:MGI:1914676]	0.325292	-1.62019	1.31722e-08	3.76124e-06	yes	down	30.98	224.26	249.4	224.45	261.93	220.55	107.21	6.18	47.33	59.13	66.77	48.91
ENSMUSG00000026494	Kif26b	kinesin family member 26B [Source:MGI Symbol;Acc:MGI:2447076]	2.78212	1.47619	0.000139664	0.0085493	yes	up	0.01	0.04	0.06	0.05	0.05	0.03	0.1	0.02	0.17	0.08	0.17	0.11
ENSMUSG00000026566	Mpzl1	myelin protein zero-like 1 [Source:MGI Symbol;Acc:MGI:1915731]	0.385948	-1.37352	7.78605e-07	0.00012175	yes	down	1.18	3.77	4.17	2.85	3.99	4.68	1.8	0.13	2.02	1.23	1.41	1.02
ENSMUSG00000026614	Slc30a10	solute carrier family 30, member 10 [Source:MGI Symbol;Acc:MGI:2685058]	0.396447	-1.3348	9.99631e-06	0.00105041	yes	down	5.41	9.72	9.95	5.41	6.89	9.93	5.46	0.59	2.12	2.46	4.96	2
ENSMUSG00000026691	Fmo3	flavin containing monooxygenase 3 [Source:MGI Symbol;Acc:MGI:1100496]	3.80979	1.92971	2.81822e-11	2.05652e-08	yes	up	11.3	83.73	109.05	98.96	85.44	100.44	222.02	38.74	333.66	449.76	354.6	262.78
ENSMUSG00000026773	Pfkfb3	6-phosphofructo-2-kinase/fructose-2,6-biphosphatase 3 [Source:MGI Symbol;Acc:MGI:2181202]	2.7524	1.46069	1.03754e-05	0.00105675	yes	up	0.83	3.02	3.24	1.61	1.81	1.29	3.29	12.46	6.02	6.97	6.38	4.33
ENSMUSG00000026839	Upp2	uridine phosphorylase 2 [Source:MGI Symbol;Acc:MGI:1923904]	2.50077	1.32237	3.6357e-06	0.000442175	yes	up	53.09	90.96	139.72	222.36	230.23	118.75	307.64	98.81	314.03	309.04	297.53	360.71
ENSMUSG00000027068	Dhrs9	dehydrogenase/reductase (SDR family) member 9 [Source:MGI Symbol;Acc:MGI:2442798]	0.247406	-2.01505	1.35577e-05	0.00130942	yes	down	0.22	1.44	0.84	0.54	1.02	2.82	0.45	0.05	0.3	0.06	0.24	0.18
ENSMUSG00000027253	Lrp4	low density lipoprotein receptor-related protein 4 [Source:MGI Symbol;Acc:MGI:2442252]	2.48541	1.31349	4.12503e-09	1.42585e-06	yes	up	0.89	1.94	2.72	2.79	1.95	2.3	3.44	2.48	4.11	6.68	5.48	5.74
ENSMUSG00000027559	Car3	carbonic anhydrase 3 [Source:MGI Symbol;Acc:MGI:88270]	0.446744	-1.16248	0.000139939	0.0085493	yes	down	543.53	1368.88	1608.41	1385.87	1771.26	1075.79	809.02	53.99	353.1	661.22	562.6	898.02
ENSMUSG00000027579	Srms	src-related kinase lacking C-terminal regulatory tyrosine and N-terminal myristylation sites [Source:MGI Symbol;Acc:MGI:101865]	0.292261	-1.77467	0.000105596	0.00709643	yes	down	0.24	0.61	0.64	0.4	0.65	0.52	0.33	0.38	0.12	0.08	0.04	0.09
ENSMUSG00000028240	Cyp7a1	cytochrome P450, family 7, subfamily a, polypeptide 1 [Source:MGI Symbol;Acc:MGI:106091]	3.67228	1.87667	2.73366e-06	0.000352026	yes	up	2.2	13.23	10.93	16.27	26.9	10.33	25.74	8.21	29.93	112.72	18.58	46.41
ENSMUSG00000028655	Mfsd2a	major facilitator superfamily domain containing 2A [Source:MGI Symbol;Acc:MGI:1923824]	2.29235	1.19683	0.000271455	0.0139826	yes	up	16.41	54.63	58.4	20.94	20.11	26.78	48.28	16.75	65.66	95.21	93.96	82.04
ENSMUSG00000028957	Per3	period circadian clock 3 [Source:MGI Symbol;Acc:MGI:1277134]	7.17846	2.84368	3.29398e-07	5.96166e-05	yes	up	1.25	0.27	0.46	0.84	1.45	0.44	4.43	4.89	4.67	6.99	4.76	5.13
ENSMUSG00000029003	Mad2l2	MAD2 mitotic arrest deficient-like 2 [Source:MGI Symbol;Acc:MGI:1919140]	0.475003	-1.07399	0.000257362	0.0135218	yes	down	3.94	22.37	16.74	18.18	18.74	20.6	11.9	1.01	8.11	6.93	7.68	6.11
ENSMUSG00000029188	Slc34a2	solute carrier family 34 (sodium phosphate), member 2 [Source:MGI Symbol;Acc:MGI:1342284]	0.221094	-2.17727	4.58226e-07	7.71641e-05	yes	down	0.2	1.17	2.29	0.63	1.13	1.57	0.34	0.03	0.37	0.12	0.39	0.22
ENSMUSG00000029238	Clock	circadian locomotor output cycles kaput [Source:MGI Symbol;Acc:MGI:99698]	0.433132	-1.20712	9.36681e-05	0.00637477	yes	down	0.94	3.43	3.9	2.48	3.12	3.63	2.25	0.11	0.76	1.81	1.51	1
ENSMUSG00000029482	Aacs	acetoacetyl-CoA synthetase [Source:MGI Symbol;Acc:MGI:1926144]	2.11607	1.08139	2.42843e-05	0.00207126	yes	up	3.79	14.56	14.09	9.55	12.48	8.06	26.25	2.34	22.34	31.4	27.79	15.72
ENSMUSG00000029657	Hsph1	heat shock 105kDa/110kDa protein 1 [Source:MGI Symbol;Acc:MGI:105053]	2.8347	1.5032	0.000371141	0.0179887	yes	up	1.2	9.01	4.95	4.35	8.04	5.7	21.73	0.83	12.75	23.49	16.79	22.91
ENSMUSG00000030244	Gys2	glycogen synthase 2 [Source:MGI Symbol;Acc:MGI:2385254]	2.17916	1.12377	1.49511e-06	0.000210883	yes	up	34.13	59.55	57.26	53.14	52.65	40.05	66.68	32.79	140.64	138.2	96.85	151.78
ENSMUSG00000030659	Nucb2	nucleobindin 2 [Source:MGI Symbol;Acc:MGI:1858179]	2.66508	1.41418	1.93636e-05	0.00170698	yes	up	0.55	4.03	1.03	1.22	1.53	1.15	3.25	0.95	2.9	4.38	4.17	5.33
ENSMUSG00000030806	Stx1b	syntaxin 1B [Source:MGI Symbol;Acc:MGI:1930705]	0.430088	-1.2173	0.00012013	0.00765977	yes	down	0.8	1.38	1.52	0.78	0.99	0.81	0.92	0.05	0.23	0.24	0.44	0.25
ENSMUSG00000031016	Wee1	WEE 1 homolog 1 (S. pombe) [Source:MGI Symbol;Acc:MGI:103075]	7.83327	2.96962	1.04957e-16	2.29769e-13	yes	up	0.19	0.54	0.74	1.16	1.08	0.54	4.16	0.45	4.98	8.78	5.54	6.95
ENSMUSG00000031024	Denn2b	DENN domain containing 2B [Source:MGI Symbol;Acc:MGI:108517]	0.291149	-1.78017	9.19463e-12	7.54822e-09	yes	down	16.39	24.39	19.86	13.09	16.9	14.42	7.58	4.23	4.73	4.63	4.62	3.44
ENSMUSG00000032010	Usp2	ubiquitin specific peptidase 2 [Source:MGI Symbol;Acc:MGI:1858178]	21.7437	4.44252	1.25882e-41	1.65346e-37	yes	up	0.77	0.84	1.38	2.76	1.1	1.15	20.74	8.31	29.64	42.87	28.71	34.68
ENSMUSG00000032024	Clmp	CXADR-like membrane protein [Source:MGI Symbol;Acc:MGI:1918816]	0.426041	-1.23093	0.000400657	0.0192771	yes	down	0.36	1.22	2.91	0.69	2.47	2.47	1.39	0.67	0.64	0.82	1.19	1.21
ENSMUSG00000032121	Tmem218	transmembrane protein 218 [Source:MGI Symbol;Acc:MGI:1913529]	0.417975	-1.25851	0.00103689	0.0391896	yes	down	0.18	1.61	1.96	2.78	1.75	1.48	0.64	0.08	0.87	0.83	0.49	0.73
ENSMUSG00000032184	Lysmd2	LysM, putative peptidoglycan-binding, domain containing 2 [Source:MGI Symbol;Acc:MGI:1917332]	2.92448	1.54818	0.00103829	0.0391896	yes	up	0.04	0.74	1.03	0.55	0.43	0.29	0.95	0.31	2.12	1.79	0.8	1.96
ENSMUSG00000032218	Ccnb2	cyclin B2 [Source:MGI Symbol;Acc:MGI:88311]	5.54638	2.47155	0.000561202	0.0249878	yes	up	0.15	0.17	0.13	0.16	0.32	0.09	0.23	0.76	0.4	0.59	0.32	1.6
ENSMUSG00000032311	Nrg4	neuregulin 4 [Source:MGI Symbol;Acc:MGI:1933833]	6.84454	2.77495	3.58639e-09	1.30853e-06	yes	up	1.49	4.37	3.82	3.82	1.85	4.07	4.4	10.03	15.3	19.83	12.05	24.07
ENSMUSG00000032349	Elovl5	ELOVL family member 5, elongation of long chain fatty acids (yeast) [Source:MGI Symbol;Acc:MGI:1916051]	0.49386	-1.01783	5.19455e-06	0.000603809	yes	down	125.69	270.42	287.13	202.48	210.31	273.91	161.87	14.85	117.97	110.32	148.48	114.17
ENSMUSG00000032484	Ngp	neutrophilic granule protein [Source:MGI Symbol;Acc:MGI:105983]	17.0486	4.09158	3.90655e-07	6.78644e-05	yes	up	0	0.17	0	0.48	0.23	0.34	2.81	0.8	9.79	1.32	2.13	0.46
ENSMUSG00000032496	Ltf	lactotransferrin [Source:MGI Symbol;Acc:MGI:96837]	19.8897	4.31395	4.02604e-06	0.000480746	yes	up	0	0.87	0	0.08	0.14	0.43	3	1.51	2.06	0.45	0.67	0.12
ENSMUSG00000032773	Chrm1	cholinergic receptor, muscarinic 1, CNS [Source:MGI Symbol;Acc:MGI:88396]	0.228142	-2.132	0.000144829	0.00876651	yes	down	0.11	0.19	0.32	0.29	0.39	0.06	0.01	0.01	0.04	0.1	0.05	0.06
ENSMUSG00000032786	Alas1	aminolevulinic acid synthase 1 [Source:MGI Symbol;Acc:MGI:87989]	5.58261	2.48094	9.50568e-09	2.90365e-06	yes	up	34.36	448.56	318.62	115.03	141.5	120.16	423.56	56.57	1308.92	2227.51	1323.19	827.19
ENSMUSG00000033066	Gas7	growth arrest specific 7 [Source:MGI Symbol;Acc:MGI:1202388]	0.416454	-1.26377	1.346e-07	3.04822e-05	yes	down	0.46	1.88	2.05	1.26	1.5	1.73	0.7	0.12	0.78	0.95	0.4	0.41
ENSMUSG00000033107	Rnf125	ring finger protein 125 [Source:MGI Symbol;Acc:MGI:1914914]	0.35297	-1.50238	0.000665999	0.0284023	yes	down	5.61	75.46	58	66.89	68.45	56.27	34.03	0.92	15.3	13.06	25.45	20.56
ENSMUSG00000033917	Gde1	glycerophosphodiester phosphodiesterase 1 [Source:MGI Symbol;Acc:MGI:1891827]	2.37673	1.24898	1.27666e-13	1.28991e-10	yes	up	7.48	20.84	23.47	20.26	26.59	23.3	34.84	13.22	51.05	65.8	37.9	50.69
ENSMUSG00000035004	Igsf6	immunoglobulin superfamily, member 6 [Source:MGI Symbol;Acc:MGI:1891393]	2.14785	1.10289	0.000347417	0.016964	yes	up	0.63	2.99	1.8	1.39	1.82	2.14	2.72	1.42	3.8	6.34	1.99	3.01
ENSMUSG00000035397	Klf16	Kruppel-like factor 16 [Source:MGI Symbol;Acc:MGI:2153049]	2.01145	1.00824	6.29949e-06	0.000707212	yes	up	0.39	1.07	0.96	0.98	1.09	1.68	2.26	0.48	2.19	2.01	1.6	2.52
ENSMUSG00000035498	Cdcp1	CUB domain containing protein 1 [Source:MGI Symbol;Acc:MGI:2442010]	0.439376	-1.18647	7.91545e-05	0.00561997	yes	down	2.56	1.85	2.66	1.36	2.51	1.33	1.02	0.3	0.51	0.81	1.04	0.32
ENSMUSG00000035686	Thrsp	thyroid hormone responsive [Source:MGI Symbol;Acc:MGI:109126]	2.60907	1.38353	2.57063e-09	1.05516e-06	yes	up	151.79	203.68	374.8	274.28	425.86	209.39	708.76	262.57	610.03	612.94	802.07	669.51
ENSMUSG00000035828	Pim3	proviral integration site 3 [Source:MGI Symbol;Acc:MGI:1355297]	2.43954	1.28661	1.85324e-07	3.99055e-05	yes	up	23.66	19.73	20.61	18.31	25.37	15.68	27.91	32.04	60.63	55.43	61.79	51.44
ENSMUSG00000036216	Leap2	liver-expressed antimicrobial peptide 2 [Source:MGI Symbol;Acc:MGI:2672795]	0.46263	-1.11207	0.000174312	0.0101309	yes	down	64.73	92.47	146.79	134.19	101.47	144.5	100.28	8.05	63.85	46.32	67.66	30.51
ENSMUSG00000036863	Syde2	synapse defective 1, Rho GTPase, homolog 2 (C. elegans) [Source:MGI Symbol;Acc:MGI:3036264]	2.1098	1.0771	2.10756e-05	0.00184552	yes	up	0.29	0.72	0.98	0.92	0.89	0.98	1.52	0.17	1.54	2.42	1.81	2.06
ENSMUSG00000036957	Lrfn3	leucine rich repeat and fibronectin type III domain containing 3 [Source:MGI Symbol;Acc:MGI:2442512]	0.30911	-1.69381	6.72391e-10	3.53274e-07	yes	down	1.1	4.01	6.52	3.67	4.95	4.19	2.17	0.18	1.08	0.99	1.32	1.08
ENSMUSG00000037071	Scd1	stearoyl-Coenzyme A desaturase 1 [Source:MGI Symbol;Acc:MGI:98239]	0.497037	-1.00858	7.08269e-05	0.00512735	yes	down	371.48	1151.41	1536.87	1036.89	1150.51	1743.27	575.65	87.36	926.68	657.56	468.68	487.49
ENSMUSG00000037169	Mycn	v-myc avian myelocytomatosis viral related oncogene, neuroblastoma derived [Source:MGI Symbol;Acc:MGI:97357]	2.99889	1.58443	0.00114002	0.0421809	yes	up	0.03	0.62	0.38	0.38	0.38	0.14	1.11	0.24	1.31	1.6	0.59	0.27
ENSMUSG00000037379	Spon2	spondin 2, extracellular matrix protein [Source:MGI Symbol;Acc:MGI:1923724]	0.340717	-1.55336	2.93917e-09	1.13547e-06	yes	down	3	10.63	5.76	4.65	6.43	3.58	2.08	0.93	1.36	2.21	1.65	1.43
ENSMUSG00000038233	Gask1a	golgi associated kinase 1A [Source:MGI Symbol;Acc:MGI:3041196]	0.303966	-1.71802	9.27698e-10	4.68666e-07	yes	down	1.7	6.21	7.78	5.81	6.37	6.7	1.78	0.68	1.3	0.81	2.32	1.84
ENSMUSG00000038550	Ciart	circadian associated repressor of transcription [Source:MGI Symbol;Acc:MGI:2684975]	29.881	4.90116	7.63688e-14	1.0031e-10	yes	up	0.81	0.18	0.03	0.83	1.34	0.55	10.91	12.67	13.51	20.4	13.96	18.98
ENSMUSG00000038656	Cyp3a16	cytochrome P450, family 3, subfamily a, polypeptide 16 [Source:MGI Symbol;Acc:MGI:106099]	28.1801	4.8166	0.000109248	0.00723634	yes	up	0.06	1.59	0	9.36	11.49	5.05	205.03	0.22	216.86	56.7	199.89	45.15
ENSMUSG00000038751	Ptk6	PTK6 protein tyrosine kinase 6 [Source:MGI Symbol;Acc:MGI:99683]	0.223932	-2.15887	0.00104168	0.0392048	yes	down	0.1	0.5	0.56	0.88	1.22	0.51	0.51	0	0.08	0.08	0.09	0.04
ENSMUSG00000039157	Fam102a	family with sequence similarity 102, member A [Source:MGI Symbol;Acc:MGI:2138935]	2.56736	1.36029	2.76042e-07	5.2172e-05	yes	up	2.51	5.09	7.71	7.45	7.64	3.58	9.33	6.96	9.56	20.57	13.42	14.67
ENSMUSG00000039457	Ppl	periplakin [Source:MGI Symbol;Acc:MGI:1194898]	2.25701	1.17441	1.30038e-05	0.00126522	yes	up	0.86	1.24	1.81	1.84	1.74	2.93	3.06	1.52	3.2	4.84	2.86	4.43
ENSMUSG00000039620	Trmt9b	tRNA methyltransferase 9B [Source:MGI Symbol;Acc:MGI:2442328]	0.307853	-1.69969	2.79465e-17	7.34155e-14	yes	down	1.37	2.84	2.92	2.15	3.44	3.67	0.94	0.31	0.62	0.83	0.91	0.99
ENSMUSG00000039981	Zc3h12d	zinc finger CCCH type containing 12D [Source:MGI Symbol;Acc:MGI:3045313]	0.218099	-2.19694	3.29525e-10	1.88188e-07	yes	down	0.47	2.26	2.45	1.62	1.53	1.12	0.64	0.02	0.34	0.27	0.37	0.3
ENSMUSG00000039982	Dtx4	deltex 4, E3 ubiquitin ligase [Source:MGI Symbol;Acc:MGI:2672905]	0.291261	-1.77962	1.49097e-13	1.39885e-10	yes	down	1.14	5.47	5.61	4.72	4.64	4.91	1.8	0.21	1.01	0.74	1.45	0.89
ENSMUSG00000040328	Olfr56	olfactory receptor 56 [Source:MGI Symbol;Acc:MGI:1333785]	0.300473	-1.73469	0.00087512	0.0348324	yes	down	0.58	0.57	1.1	3.24	3.13	2.72	0.46	3.01	1.35	2.68	0.12	0.93
ENSMUSG00000040430	Pitpnc1	phosphatidylinositol transfer protein, cytoplasmic 1 [Source:MGI Symbol;Acc:MGI:1919045]	2.00578	1.00416	0.00024981	0.0132984	yes	up	2.53	4.2	3.9	3.83	3.94	3.92	5.1	3.91	5.55	8.75	7.31	5.08
ENSMUSG00000040659	Efhd2	EF hand domain containing 2 [Source:MGI Symbol;Acc:MGI:106504]	2.10762	1.07562	4.49751e-05	0.00353742	yes	up	7.23	27.62	24.78	23.95	25.29	25.18	37.76	4.46	56.44	69.44	50.95	51.76
ENSMUSG00000040675	Mthfd1l	methylenetetrahydrofolate dehydrogenase (NADP+ dependent) 1-like [Source:MGI Symbol;Acc:MGI:1924836]	4.01054	2.0038	2.48479e-08	6.39954e-06	yes	up	0.06	0.21	0.25	0.31	0.26	0.21	0.34	0.41	0.57	1.33	1	0.53
ENSMUSG00000040957	Cables1	CDK5 and Abl enzyme substrate 1 [Source:MGI Symbol;Acc:MGI:1927065]	0.318334	-1.65139	9.67195e-14	1.15492e-10	yes	down	1.96	3.1	3.34	2.74	3.45	2.55	1.38	0.39	0.75	0.64	0.93	0.63
ENSMUSG00000041119	Pde9a	phosphodiesterase 9A [Source:MGI Symbol;Acc:MGI:1277179]	0.481715	-1.05375	0.000625576	0.0268527	yes	down	10.52	17.6	17.56	18.41	22.99	18.34	14.64	4.16	6.52	4.9	8.2	4.67
ENSMUSG00000041293	Adgrf1	adhesion G protein-coupled receptor F1 [Source:MGI Symbol;Acc:MGI:1924846]	0.487472	-1.03661	6.77401e-08	1.61776e-05	yes	down	9.71	9.61	3.53	3.16	3.45	2.05	5.28	6.26	0.81	1.68	3.23	4.24
ENSMUSG00000042115	Klhdc8a	kelch domain containing 8A [Source:MGI Symbol;Acc:MGI:2442630]	0.389227	-1.36132	1.04589e-05	0.00105675	yes	down	0.28	1.22	1.21	0.67	1.4	0.98	0.64	0.02	0.34	0.46	0.34	0.3
ENSMUSG00000042246	Tmc7	transmembrane channel-like gene family 7 [Source:MGI Symbol;Acc:MGI:2443317]	3.42409	1.77572	0.000583781	0.0256454	yes	up	1.58	0.75	0.58	0.13	0.2	0.32	0.73	4.55	1.31	1.44	0.67	0.97
ENSMUSG00000042363	Lgalsl	lectin, galactoside binding-like [Source:MGI Symbol;Acc:MGI:1916114]	0.4294	-1.21961	3.09676e-06	0.000393479	yes	down	1.42	7.94	5.96	5.27	6.04	5.68	3.59	0.24	2.24	2.83	2.06	1.84
ENSMUSG00000042510	AA986860	expressed sequence AA986860 [Source:MGI Symbol;Acc:MGI:2138143]	2.85157	1.51176	0.000686877	0.0290101	yes	up	0.81	0.59	0.73	1.05	0.69	1.04	0.83	1.05	1.02	3.88	0.65	0.74
ENSMUSG00000043165	Lor	loricrin [Source:MGI Symbol;Acc:MGI:96816]	2.30813	1.20672	0.000707635	0.0296958	yes	up	0.26	0.53	0.37	0.34	0.18	0.61	1.03	0.15	1.19	1.18	0.79	0.72
ENSMUSG00000044345	Marveld1	MARVEL (membrane-associating) domain containing 1 [Source:MGI Symbol;Acc:MGI:2147570]	2.47621	1.30813	5.97715e-10	3.27124e-07	yes	up	2.37	6.97	8.53	8.19	9.35	6.26	13.82	5.56	12.54	20.7	12.59	21.19
ENSMUSG00000044583	Tlr7	toll-like receptor 7 [Source:MGI Symbol;Acc:MGI:2176882]	2.10191	1.0717	5.91632e-05	0.00451807	yes	up	0.12	0.78	1.71	0.52	0.4	0.45	0.9	0.2	0.76	3.38	1.17	1.55
ENSMUSG00000044734	Serpinb1a	serine (or cysteine) peptidase inhibitor, clade B, member 1a [Source:MGI Symbol;Acc:MGI:1913472]	0.239396	-2.06253	4.43254e-05	0.00350732	yes	down	1.05	18.86	27.63	22.58	23.1	25.31	7.82	0.51	2.6	6.75	6.02	5.45
ENSMUSG00000048498	Cd300e	CD300E molecule [Source:MGI Symbol;Acc:MGI:2387602]	2.10291	1.07238	0.00107408	0.0401755	yes	up	0.23	2.72	1.37	1.13	1.27	1.47	3.07	0.37	2.61	3.78	3.52	2.4
ENSMUSG00000049038	Mterf2	mitochondrial transcription termination factor 2 [Source:MGI Symbol;Acc:MGI:1921488]	0.443875	-1.17177	0.000275891	0.0141005	yes	down	3.33	3.28	1.91	2.82	2.94	1.98	1.71	0.47	0.62	0.82	1.14	0.49
ENSMUSG00000049555	Tmie	transmembrane inner ear [Source:MGI Symbol;Acc:MGI:2159400]	0.474079	-1.0768	0.000239282	0.0129875	yes	down	5.75	11.39	10.61	10.86	9.19	12.44	6.39	1.93	2.76	3.07	3.96	2.66
ENSMUSG00000049580	Tsku	tsukushi, small leucine rich proteoglycan [Source:MGI Symbol;Acc:MGI:2443855]	10.8716	3.4425	3.95152e-38	2.59516e-34	yes	up	2.79	5.75	7.29	5.02	7.09	7.33	34	21.35	60.97	107.97	43.88	58.87
ENSMUSG00000049985	Ankrd55	ankyrin repeat domain 55 [Source:MGI Symbol;Acc:MGI:1924568]	3.39603	1.76385	0.000863714	0.0345881	yes	up	0.05	0.02	0.07	0.17	0.11	0.08	0.24	0.07	0.37	0.19	0.47	0.21
ENSMUSG00000050234	Gja4	gap junction protein, alpha 4 [Source:MGI Symbol;Acc:MGI:95715]	2.0474	1.03379	0.000610387	0.0263167	yes	up	0.62	5.47	4.79	4.16	2.78	3.21	3.9	1.58	7.36	9.08	8.51	6.75
ENSMUSG00000052040	Klf13	Kruppel-like factor 13 [Source:MGI Symbol;Acc:MGI:1354948]	2.25507	1.17317	1.87355e-06	0.000248577	yes	up	4.06	8.53	10.8	8.66	11.75	6.32	22.35	5.24	17.52	19.21	19.37	21.39
ENSMUSG00000052632	Asap2	ArfGAP with SH3 domain, ankyrin repeat and PH domain 2 [Source:MGI Symbol;Acc:MGI:2685438]	0.285727	-1.80729	5.62278e-11	3.51692e-08	yes	down	2.05	3.77	5.23	3.47	5.78	3.84	1.48	0.94	0.77	0.77	1.21	0.75
ENSMUSG00000052688	Rab7b	RAB7B, member RAS oncogene family [Source:MGI Symbol;Acc:MGI:2442295]	2.14965	1.1041	5.79851e-05	0.004454	yes	up	0.11	0.65	0.55	0.36	0.47	0.39	0.95	0.22	0.79	0.96	0.74	0.57
ENSMUSG00000053219	Raet1e	retinoic acid early transcript 1E [Source:MGI Symbol;Acc:MGI:2675273]	0.379429	-1.3981	2.70128e-07	5.2172e-05	yes	down	8.41	11.06	14.93	12.43	14.07	8.21	2.69	9.35	2.9	3.14	5.32	6.02
ENSMUSG00000053617	Sh3pxd2a	SH3 and PX domains 2A [Source:MGI Symbol;Acc:MGI:1298393]	0.451317	-1.14779	0.00018356	0.0106214	yes	down	1.12	3.96	5.58	4.77	7.53	3.62	3.64	0.41	1.47	1.69	1.73	1.37
ENSMUSG00000054417	Cyp3a44	cytochrome P450, family 3, subfamily a, polypeptide 44 [Source:MGI Symbol;Acc:MGI:2449818]	6.13736	2.61762	1.79092e-05	0.00162233	yes	up	5.94	25.99	14.12	42.23	27.09	42.73	231.24	9.06	299.67	53.25	280.35	79.72
ENSMUSG00000055116	Arntl	aryl hydrocarbon receptor nuclear translocator-like [Source:MGI Symbol;Acc:MGI:1096381]	0.12086	-3.04859	8.30618e-11	4.95917e-08	yes	down	1.12	8.85	6.87	3.47	4.94	6.49	1.73	0.1	0.42	0.33	0.46	0.38
ENSMUSG00000055546	Timd4	T cell immunoglobulin and mucin domain containing 4 [Source:MGI Symbol;Acc:MGI:2445125]	2.30229	1.20307	4.67982e-05	0.0036589	yes	up	2.22	8.34	4.67	4.95	4.18	6.61	7.96	6.94	10.69	18.8	7.02	11
ENSMUSG00000055866	Per2	period circadian clock 2 [Source:MGI Symbol;Acc:MGI:1195265]	6.30497	2.65649	4.90056e-07	8.0461e-05	yes	up	4.47	1.32	1.99	1.36	1.68	0.96	4.31	6.78	4.19	9.41	5.06	5.96
ENSMUSG00000056054	S100a8	S100 calcium binding protein A8 (calgranulin A) [Source:MGI Symbol;Acc:MGI:88244]	4.82967	2.27193	1.04059e-05	0.00105675	yes	up	1.18	3.14	4.65	4.32	3.09	6.35	14.83	3.68	50.5	6.53	15.32	7.23
ENSMUSG00000056071	S100a9	S100 calcium binding protein A9 (calgranulin B) [Source:MGI Symbol;Acc:MGI:1338947]	4.18788	2.06622	1.54635e-05	0.00144052	yes	up	2.33	7.27	8.35	12.61	11.31	11.24	24.15	11.27	96.94	20.94	19.65	13.14
ENSMUSG00000056608	Chd9	chromodomain helicase DNA binding protein 9 [Source:MGI Symbol;Acc:MGI:1924001]	2.85094	1.51144	3.06823e-07	5.67623e-05	yes	up	5.67	21.38	18.67	18.17	17.8	15.17	24.66	11.56	28.98	37.7	24.25	46.14
ENSMUSG00000058672	Tubb2a	tubulin, beta 2A class IIA [Source:MGI Symbol;Acc:MGI:107861]	0.394377	-1.34235	0.000903132	0.0357308	yes	down	8.63	140.13	97.39	39.9	60.19	107.18	48.77	5.45	23.29	23.59	32.2	20.76
ENSMUSG00000059824	Dbp	D site albumin promoter binding protein [Source:MGI Symbol;Acc:MGI:94866]	5.01881	2.32735	0.00044423	0.0206033	yes	up	49.05	3.5	9.24	56.6	48.27	15.63	100.02	167.42	119.64	96.01	126.04	129.24
ENSMUSG00000061815	Rufy4	RUN and FYVE domain containing 4 [Source:MGI Symbol;Acc:MGI:3588214]	7.23483	2.85496	0.00138626	0.0495597	yes	up	0.28	0.14	0.21	0.05	0.07	0.07	0.15	1.26	0.57	0.51	0.3	0.83
ENSMUSG00000066687	Zbtb16	zinc finger and BTB domain containing 16 [Source:MGI Symbol;Acc:MGI:103222]	2.52029	1.33359	0.000265272	0.0138268	yes	up	1.74	3.17	6.48	1.3	1.99	1.94	9.47	1.94	6.02	7.13	7.57	3.24
ENSMUSG00000067279	Ppp1r3c	protein phosphatase 1, regulatory subunit 3C [Source:MGI Symbol;Acc:MGI:1858229]	0.338993	-1.56067	3.66511e-05	0.00293544	yes	down	3.93	21.57	34.89	24.82	24.78	36.62	15.64	1.17	4.8	6.73	11.49	5.07
ENSMUSG00000067430	Zfp763	zinc finger protein 763 [Source:MGI Symbol;Acc:MGI:1920701]	0.495338	-1.01352	0.000551587	0.0248972	yes	down	1.99	0.49	0.75	0.77	1.17	0.61	0.44	2.17	0.25	0.53	0.4	0.21
ENSMUSG00000068086	Cyp2d9	cytochrome P450, family 2, subfamily d, polypeptide 9 [Source:MGI Symbol;Acc:MGI:88606]	0.472192	-1.08256	8.40567e-05	0.00586987	yes	down	26.72	74.01	67.14	55.7	56.57	39.2	19.19	5.6	15.3	27.58	27.59	43.84
ENSMUSG00000068876	Cgn	cingulin [Source:MGI Symbol;Acc:MGI:1927237]	0.48619	-1.04041	2.03905e-07	4.31983e-05	yes	down	3.43	7.41	7.6	6.6	7.7	6.75	4.65	1.14	2.34	3.37	2.93	2.18
ENSMUSG00000071715	Ncf4	neutrophil cytosolic factor 4 [Source:MGI Symbol;Acc:MGI:109186]	2.09917	1.06982	0.000836158	0.03369	yes	up	1.73	1.95	1.74	1.86	2.2	1.85	3.77	3.1	4.76	5.04	2.62	3.12
ENSMUSG00000074254	Cyp2a4	cytochrome P450, family 2, subfamily a, polypeptide 4 [Source:MGI Symbol;Acc:MGI:88596]	4.79203	2.26064	1.55836e-09	6.82304e-07	yes	up	244.89	143.09	211.14	189.71	186.26	234.53	994.27	158.67	1899.25	1090.46	1253.28	1065.81
ENSMUSG00000074521	Gm14327	predicted gene 14327 [Source:MGI Symbol;Acc:MGI:3652188]	2.42288	1.27672	1.19646e-07	2.7571e-05	yes	up	1.85	2.7	2.58	3.03	2.49	2.94	4.97	14.04	5.35	12.34	5.94	5.96
ENSMUSG00000074623	Gm826	predicted gene 826 [Source:MGI Symbol;Acc:MGI:2685672]	4.33073	2.11461	0.00011144	0.00724636	yes	up	0.6	2.28	1.16	1.12	2.36	0.71	2.67	3.48	3.83	4.06	2.9	4.62
ENSMUSG00000074768	Bhmt	betaine-homocysteine methyltransferase [Source:MGI Symbol;Acc:MGI:1339972]	0.345158	-1.53467	1.60991e-05	0.00147875	yes	down	632.44	1232.79	2516.74	1066.3	1706.77	1156.14	646.49	39.55	389.3	420.02	431.74	856.66
ENSMUSG00000078881	Gm14434	predicted gene 14434 [Source:MGI Symbol;Acc:MGI:3702417]	5.52517	2.46602	0.000648941	0.027765	yes	up	0	0.43	0.21	0.41	0	1.24	1.65	0.29	2.62	2.65	2.25	1.93
ENSMUSG00000081010	Gm13880	predicted gene 13880 [Source:MGI Symbol;Acc:MGI:3649539]	0.149335	-2.74337	0.00072807	0.0304561	yes	down	0.11	2.79	3.93	1.93	2.1	3.3	0.67	0	0	0	0.87	0.28
ENSMUSG00000089712	Gm15889	predicted gene 15889 [Source:MGI Symbol;Acc:MGI:3802159]	2.96034	1.56576	0.00020997	0.0115881	yes	up	0.26	2.31	1.3	0.63	0.69	0.53	1.55	1.29	3.28	3.81	3.34	1.66
ENSMUSG00000090306	Adh6-ps1	alcohol dehydrogenase 6 (class V), pseudogene 1 [Source:MGI Symbol;Acc:MGI:1918999]	0.423671	-1.23898	8.95813e-07	0.00013682	yes	down	3.4	5.77	6.29	3.91	5.55	2.68	2.25	0.47	1.51	2.4	2.63	2.33
ENSMUSG00000090622	A930033H14Rik	RIKEN cDNA A930033H14 gene [Source:MGI Symbol;Acc:MGI:2444562]	9.20388	3.20224	3.41876e-06	0.000423636	yes	up	0.25	0.16	0.23	0.23	0.25	0.1	1.24	1.99	0.78	1.84	0.78	0.41
ENSMUSG00000091780	Sco2	SCO2 cytochrome c oxidase assembly protein [Source:MGI Symbol;Acc:MGI:3818630]	0.412121	-1.27886	0.00123735	0.0453985	yes	down	70.7	56.43	65.58	55.95	50.68	61.82	31.5	14.43	19.56	16.83	26.95	22.65
ENSMUSG00000094156	Sult2a7	sulfotransferase family 2A, dehydroepiandrosterone (DHEA)-preferring, member 7 [Source:MGI Symbol;Acc:MGI:3645246]	0.177538	-2.4938	6.67715e-05	0.0049832	yes	down	7.78	233.6	90.41	49.73	72.26	33.72	32.38	1.27	2.6	5.35	13.79	20.59
ENSMUSG00000097286	Gm26684	predicted gene, 26684 [Source:MGI Symbol;Acc:MGI:5477178]	0.427416	-1.22629	2.15809e-08	5.78806e-06	yes	down	0.56	1.22	0.71	1.44	1.36	0.64	0.49	0.33	0.27	0.32	0.79	0.75
ENSMUSG00000106069	Gm6135	prediticted gene 6135 [Source:MGI Symbol;Acc:MGI:3643755]	6.71965	2.74839	1.40057e-05	0.00132349	yes	up	5.83	29.07	22.76	41.26	29.72	55.71	256.44	1.63	201.51	121.26	502.46	133.86
ENSMUSG00000108815	Gm49388	predicted gene, 49388 [Source:MGI Symbol;Acc:MGI:6121614]	0.453942	-1.13942	0.000117811	0.00754855	yes	down	68.3	62.09	75.13	76.3	86.34	59.11	48.21	12.23	24.07	24.2	37.96	34.66
ENSMUSG00000109904	Gm45819	predicted gene 45819 [Source:MGI Symbol;Acc:MGI:5804934]	31.5997	4.98184	7.35019e-06	0.000797891	yes	up	0	0	0.08	0.03	0	0.04	0.16	0	0.8	1.47	0.44	1.57
ENSMUSG00000112109	Gm30906	predicted gene, 30906 [Source:MGI Symbol;Acc:MGI:5590065]	0.153167	-2.70683	2.63012e-16	4.93524e-13	yes	down	2.57	5.69	6.01	6.88	5.76	5.91	1.46	0.03	0.8	0.39	1.4	0.46
ENSMUSG00000112384	Gm34921	predicted gene, 34921 [Source:MGI Symbol;Acc:MGI:5594080]	0.174922	-2.51522	0.000948317	0.0365283	yes	down	0.3	0.37	0.64	0.98	0.43	1.18	0	0	0.35	0.25	0	0.09
ENSMUSG00000112774	Gm36041	predicted gene, 36041 [Source:MGI Symbol;Acc:MGI:5595200]	0.339662	-1.55783	3.37447e-08	8.20808e-06	yes	down	4.12	9.72	7.77	11.47	8.59	10.88	4.78	0.61	2.61	1.83	4.12	2
ENSMUSG00000113063	Gm34667	predicted gene, 34667 [Source:MGI Symbol;Acc:MGI:5593826]	0.468768	-1.09305	1.19e-09	5.58239e-07	yes	down	4.8	8.26	8.04	7.05	7.11	6.67	3.23	1.23	3.56	3.2	2.82	2.28
ENSMUSG00000113961	Gm48498	predicted gene, 48498 [Source:MGI Symbol;Acc:MGI:6098024]	3.09541	1.63013	0.00013053	0.00812567	yes	up	0.2	0.19	0.16	0.15	0.34	0.34	1.1	0.24	0.97	0.4	0.88	0.33
ENSMUSG00000115919	Gm31583	predicted gene, 31583 [Source:MGI Symbol;Acc:MGI:5590742]	0.38277	-1.38545	1.54938e-06	0.000214222	yes	down	3.07	2.25	8.13	8.29	4.91	4.89	1.43	0.61	3.4	3.01	5.24	1.46
ENSMUSG00000116165	Pdxp	pyridoxal (pyridoxine, vitamin B6) phosphatase [Source:MGI Symbol;Acc:MGI:1919282]	5.79382	2.53451	0.000170445	0.00999463	yes	up	0.16	0.03	0.06	0.18	0.16	0.06	0.13	0.28	0.49	1.23	0.35	1.18
ENSMUSG00000117485	Gm19696	predicted gene, 19696 [Source:MGI Symbol;Acc:MGI:5011881]	0.40606	-1.30023	0.000591016	0.0257907	yes	down	13.12	10.06	13.51	11.54	12.22	16.53	6.9	2.76	4.38	4.09	6.23	3.9
